# Supplementary material
Source: PubMed Central journal article supplement (PMC2819470)

*Supporting Information for:*

**Gram-Scale Synthesis of (+)-Spongistatin 1. Development of an Improved, Scalable  
Synthesis of the F-Ring Subunit, Fragment Union, and Final Elaboration**

Amos B. Smith, III<sup>\*</sup>, Takashi Tomioka, Christina A. Risatti, Jeffrey B. Sperry, and Chris  
Sfougataakis

*Department of Chemistry, Monell Chemical Senses Center, and Laboratory for Research on  
the Structure of Matter, University of Pennsylvania, Philadelphia, Pennsylvania 19104*

## General Experimental

All non-aqueous reactions were carried out in oven or flame-dried glassware under an argon atmosphere, unless otherwise noted. All solvents were filtered under argon through activated alumina and copper solvent purification system supplied by Innovative Technology. All argon was deoxygenated by passing it through an "OXICLEAR" tube from Aldrich. Triethylamine, hexamethylphosphoramide, hexamethyldisilazane, and diisopropylamine were freshly distilled from calcium hydride. *n*-Butyllithium and *t*-butyllithium were purchased from Aldrich and titrated immediately before use with diphenylacetic acid. Cerium(III) chloride hydrate was dried under vacuum at 110 °C overnight and stored in a desiccator. All other commercially available reagents were used as received. Reactions were magnetically stirred and monitored by thin layer chromatography (TLC) with 0.25 mm pre-coated silica gel plates. Flash chromatography was performed with silica gel 60 (particle size 230 - 400 mesh) supplied by either Sorbent Technologies or Silicycle. Yields refer to chromatographically and spectroscopically pure compounds, unless otherwise stated. Infrared spectra were recorded on a Perkin-Elmer Model 283B FT/IR spectrometer. <sup>1</sup>H and <sup>13</sup>C NMR data was obtained on a Bruker AM-500 spectrometer and chemical shifts are reported (ppm) relative to chloroform (d 7.26), benzene (d 7.15), or acetonitrile (d 1.94) for <sup>1</sup>H NMR and either chloroform (d 77.0), benzene (d 128.0), acetonitrile (d 118.69) for <sup>13</sup>C NMR.

## Large-Scale Preparation of Aldehyde (+)-7

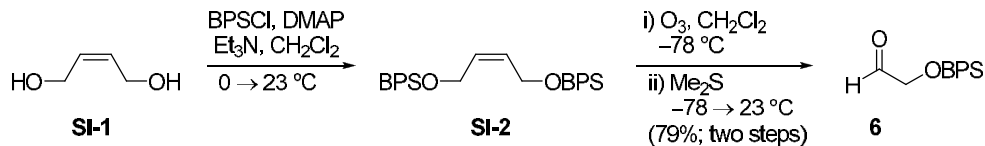

**Aldehyde 6.** To a 0 °C solution of *cis*-2-butene-1,4-diol **SI-1** (16.5 g, 15.4 mL, 0.187 mol, 1.0 equiv.) in 400 mL of dry CH<sub>2</sub>Cl<sub>2</sub> was added DMAP (2.27 g, 1.87 mmol, 0.10 equiv.) and triethylamine (56 mL, 0.56 mol, 3.0 equiv.). To this solution was added dropwise BPSCl (108 g, 102 mL, 0.392 mol, 2.1 equiv.) via addition funnel. Once addition is complete (ca. 1.5 hours), the addition funnel was rinsed with 50 mL of CH<sub>2</sub>Cl<sub>2</sub>. The cloudy reaction was allowed to slowly warm to 23 °C and allowed to stir at this temperature overnight (~14 hours total reaction time). The reaction was quenched with 200 mL of saturated NaHCO<sub>3</sub>, diluted with 200 mL of water and extracted. The aqueous layer was extracted with two 250 mL portions of CH<sub>2</sub>Cl<sub>2</sub> and the combined organics were washed with 200 mL of brine. The organics were dried over sodium sulfate and concentrated to yield alkene **SI-2** as a pale-yellow oil that was used in the next reaction without further purification.

A solution of the above **SI-2** in 300 mL of CH<sub>2</sub>Cl<sub>2</sub> was cooled to -78 °C. Ozone was bubbled through until the solution remained blue (ca. 4 hours on this scale). Argon was then bubbled through the solution to remove the excess ozone for approximately 20-30 minutes. Methylsulfide (64 mL, 871 mmol, 4.6 equiv.) was added dropwise via addition funnel over 1 hour. The reaction was removed from the -78 °C bath and allowed to warm to ambient temperature. The decomposition of the ozonide was monitored by TLC until complete (usually 3 days before ozonide decomposition was judged complete by TLC). The reaction was diluted with 750 mL of diethyl ether and washed with brine (2 x 150 mL). The organics were dried over sodium sulfate and concentrated. Silica gel chromatography (98/2 Hex/EtOAc to 90/10 Hex/EtOAc) provided 88.0 g of *tert*-

butyldiphenylsilyloxyacetaldehyde **6** as a colorless oil (79%; two steps) with spectral data consistent with values reported in the literature.<sup>21</sup>

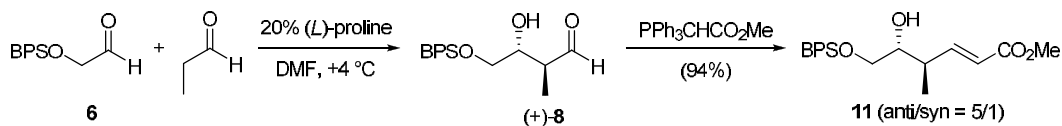

**Ester 11.** Into a 4 °C suspension of *tert*-butyldiphenylsilyloxyacetaldehyde (**6**) (107.5 g, 0.360 mol, 1.0 equiv.) and *L*-proline (8.29 g, 72 mmol, 0.2 equiv.) in dioxane (350 mL) and DMF (55 mL) was added dropwise a solution of propionaldehyde (131 mL, 1.8 mol, 5.0 equiv.) in dioxane (350 mL) over 28 hours via addition funnel. The mixture was allowed to stir for an additional 28 hours at the same temperature. Following completion, the reaction was diluted with a 1:1 hexanes:diethyl ether mixture (2 L) and vigorously washed with 20 portions of water (400 mL) and one portion of brine (400 mL). The organics were dried over Na<sub>2</sub>SO<sub>4</sub> and concentrated. The crude oil was used directly for the next reaction. Attempts to purify this material led to significant depreciation of the yield, presumably due to the instability of (+)-**8** to silica gel.

Into a solution of unpurified (+)-**8** in 250 mL of CH<sub>2</sub>Cl<sub>2</sub> was added dropwise a solution of PPh<sub>3</sub>=CHCO<sub>2</sub>Me (180.5 g, 0.54 mol, in 540 mL CH<sub>2</sub>Cl<sub>2</sub>, 1.5 equiv.) via addition funnel over 5 hours, keeping the internal temperature of the solution below 30 °C. The addition funnel was rinsed with an additional 100 mL of CH<sub>2</sub>Cl<sub>2</sub> and the reaction was stirred for 10 hours at room temperature. The solvent was removed under reduced pressure and the crude material dissolved in 300 mL of hexanes. The mixture was cooled to 0 °C to precipitate the triphenylphosphine oxide and filtered. The hexanes was evaporated and the material purified by silica gel chromatography (Hex/EtOAc = 95/5 to 85/15) to afford 139.6 g (94%; two steps) of **11** as an inseparable 5/1 mixture of anti/syn diastereomers.

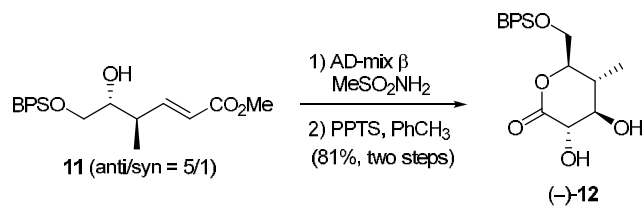

**Lactone (-)-12.** A mixture of  $\text{K}_2\text{OsO}_2(\text{OH})_2$  (317 mg, 0.862 mmol, 0.006 equiv.),  $(\text{DHQD})_2\text{PHAL}$  (1.68 g, 2.16 mmol, 0.015 equiv.),  $\text{K}_3\text{Fe}(\text{CN})_6$  (142 g, 431.1 mmol, 3.0 equiv.),  $\text{K}_2\text{CO}_3$  (59.6 g, 431.1 mmol, 3.0 equiv.), and  $\text{MeSO}_2\text{NH}_2$  (13.7 g, 143.7 mmol, 1.0 equiv.) in 1:1 *t*-BuOH/ $\text{H}_2\text{O}$  (440 mL) was stirred for 30 minutes at room temperature. This mixture was slowly poured into a 4 °C solution of **11** (59.3 g, 143.7 mmol, 1.0 equiv.) in *t*-BuOH/ $\text{H}_2\text{O}$  (1 L). The reaction was stirred via mechanical stirrer at 4 °C for 48 hours. When complete, solid  $\text{Na}_2\text{S}_2\text{O}_3$  (34 g) was added and the mixture stirred for 1.5 hours after warming to room temperature (color change from orange to dark green). After phase separation (upper: *t*-BuOH, lower:  $\text{H}_2\text{O}$ ), the aqueous layer was extracted five times with EtOAc (500 mL). The combined organics were dried over  $\text{Na}_2\text{SO}_4$  and concentrated. The unpurified triol was used directly for the next reaction.

The unpurified triol was azeotroped twice with benzene (200 mL) and dissolved in toluene (1 L). PPTS (38.4 g, 0.153 mmol, 1.0 equiv.) was added and the reaction was stirred for 2 hours at room temperature. When complete, the reaction was quenched with a saturated  $\text{NaHCO}_3$  solution (300 mL). The organics were washed with brine (300 mL) and concentrated. The crude oil was purified by silica gel chromatography (Hex/EtOAc = 3/1 to 2/3) to afford (-)-**12** as a colorless, thick paste (40.2 g, 81%; two steps, based on *anti* diastereomer).  $[\alpha]_{\text{D}}^{20} -33.8$  (*c* 0.56,  $\text{CHCl}_3$ ); IR (neat) 3419, 3071, 2930, 1739, 1471, 1428, 1390, 1112  $\text{cm}^{-1}$ ;  $^1\text{H}$  NMR (500 MHz,  $\text{CDCl}_3$ )  $\delta$  7.67-7.63 (m, 4H), 7.47-7.37 (m, 6H), 4.04 (d,  $J = 10.0$  Hz, 1H), 4.00 (dt,  $J = 10.1, 2.4$  Hz, 1H), 3.94 (dd,  $J = 11.8, 2.3$  Hz, 1H), 3.76 (dd,  $J = 11.8, 2.5$  Hz, 1H), 3.62 (t,  $J = 10.3$  Hz, 1H), 3.40-3.30 (br, 1H), 2.80-2.70 (br, 1H), 2.42 (m, 1H), 1.09 (d,  $J = 6.6$  Hz, 3H), 1.06 (s, 9H);  $^{13}\text{C}$  (125 MHz,  $\text{CDCl}_3$ )  $\delta$  173.1, 135.6,

135.5, 132.8, 132.5, 129.9, 129.8, 127.8, 127.7, 84.3, 73.3, 72.9, 62.9, 34.8, 26.8, 19.2, 13.2; High resolution mass spectrum (+ESI)  $m/z$  437.1757 [(M+Na)]<sup>+</sup>; calcd for C<sub>23</sub>H<sub>30</sub>O<sub>5</sub>SiNa 437.1760].

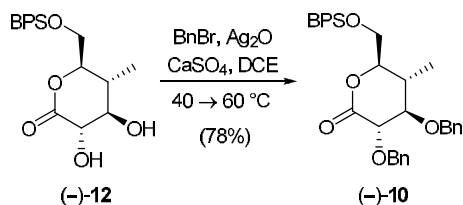

**Bis-Benzylether (-)-10.** This reaction is carried out in the absence of light. To a solution of (-)-12 (42.1 g, 101.5 mmol, 1.0 equiv.) in anhydrous 1,2-dichloroethane (210 mL) was added freshly prepared<sup>1</sup> silver(I) oxide (46.9 g, 213 mmol, 2.0 equiv.), followed by anhydrous CaSO<sub>4</sub> (69.1 g, 507 mmol, 5.0 equiv.) and freshly distilled benzyl bromide (23.8 mL, 213 mmol, 2.0 equiv.). The suspension was heated to 40 °C and stirred vigorously for 24 hours. The reaction was allowed to cool to room temperature and an additional portion of silver(I) oxide (46.9 g, 213 mmol, 2.0 equiv.) and benzyl bromide (23.8 mL, 213 mmol, 2.0 equiv.) were added. The suspension was heated to 60 °C and stirred vigorously for an additional 8 to 10 hours until judged complete by TLC. Once complete, the mixture was cooled to room temperature, filtered through Celite and concentrated. The residue was purified by silica gel chromatography (Hex/EtOAc = 9/1) to afford 47.1 g (78%) of (-)-10 as a colorless paste. Any additional monobenzylated product (17-20 %) can be recycled according to these described conditions.  $[\alpha]_D^{20}$  -45.6 (*c* 1.07, CHCl<sub>3</sub>); IR (neat) 3068, 2930, 1749, 1454, 1428, 1390, 1360, 1231, 1112 cm<sup>-1</sup>; <sup>1</sup>H NMR (500 MHz, CDCl<sub>3</sub>) δ 7.69-7.26 (m, 20H), 5.09 (d, *J* = 11.2 Hz, 1H), 4.81 (d, *J* = 11.2 Hz, 1H), 4.70 (d, *J* = 11.2 Hz, 1H), 4.56 (d, *J* = 11.3 Hz, 1H), 4.09 (d, *J* = 7.3 Hz, 1H), 4.04 (dt, *J* = 10.1, 2.6, Hz, 1H), 3.91 (dd, *J* = 11.7, 2.4 Hz, 1H), 3.75 (dd, *J* = 11.8, 3.0

<sup>1</sup> Silver(I) oxide can be easily prepared by dissolving 90 g of NaOH in 1.0 L of water and adding this solution SLOWLY over 3 hours to a solution of 370 g of AgNO<sub>3</sub> in 1.0 L of water at ambient temperature. This mixture is stirred via mechanical stirrer in a 4 L flask covered with aluminum foil overnight. The suspension is filtered and the solid washed with 2 L of water and 1 L of diethyl ether. The solid silver(I) oxide is collected and placed into a 1 L flask and placed under vacuum on a rotary evaporator overnight (flask protected from light with foil). The following morning, the flask is placed under high vacuum until a free-flowing solid remains and no water collects in vacuum trap (approximately 2 days). Silver(I) oxide is stored in dark bottles in a desiccator.

Hz, 1H), 3.50 (dd,  $J = 9.4, 7.3$  Hz, 1H), 2.38-2.30 (m, 1H), 1.05 (s, 9H), 1.03 (d,  $J = 3.4$  Hz, 3H);  $^{13}\text{C}$  (125 MHz,  $\text{CDCl}_3$ )  $\delta$  170.4, 137.7, 137.3, 135.7, 135.5, 133.0, 132.6, 129.8, 128.4, 128.3, 128.2, 128.1, 128.0, 127.9, 127.8, 127.7, 127.6, 82.2, 80.8, 79.8, 74.1, 63.1, 35.4, 26.8, 19.3, 14.1; High resolution mass spectrum (+ESI)  $m/z$  617.2718  $[(\text{M}+\text{Na})]^+$ ; calcd for  $\text{C}_{37}\text{H}_{42}\text{O}_5\text{SiNa}$  617.2699].

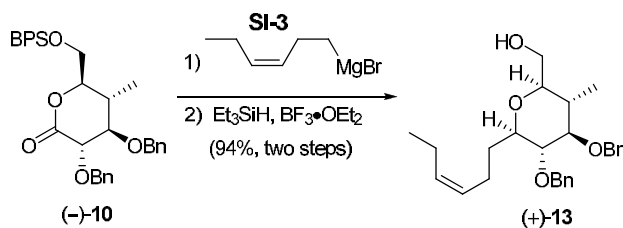

A solution of  $\text{(-)-10}$  (25.0 g, 42 mmol, 1.0 equiv.) in THF (250 mL) was cooled to  $-78$  °C and a 1M solution of **SI-3** (84 mmol, 84 mL) was added dropwise over 30 minutes. After stirring for 1.5 hours at the same temperature, the reaction was warmed to  $0$  °C and quenched with a saturated  $\text{NH}_4\text{Cl}$  solution (150 mL) and diluted with water (50 mL). After phase separation, the aqueous layer was extracted with EtOAc (3 x 100 mL). The combined organics were washed with brine (100 mL), dried over  $\text{Na}_2\text{SO}_4$  and concentrated. The hemiketal was taken on to the next step without further purification.

To a solution of the intermediate hemiketal in 380 mL of  $\text{CH}_3\text{CN}$  at  $-40$  °C was added  $\text{Et}_3\text{SiH}$  (20.3 mL, 126 mmol, 3.0 equiv.) followed by  $\text{BF}_3\cdot\text{OEt}_2$  (16.0 mL, 126 mmol, 3.0 equiv.) dropwise under argon. After stirring for 30 minutes at the same temperature, the reaction was allowed to slowly warm to  $0$  °C over 1.25 hours. The reaction was quenched by the addition of a saturated solution of  $\text{NaHCO}_3$  (250 mL) and diluted with water (100 mL). After phase separation, the aqueous layer was extracted with EtOAc (3 x 300 mL). The combined organics were dried over  $\text{Na}_2\text{SO}_4$  and concentrated. The residue was purified by silica gel chromatography (Hex/EtOAc = 95/5 to 80/20) to

yield 16.76 g of (+)-**13** as a colorless oil (94%; two steps) with spectral data matching our previous reports.<sup>15</sup>

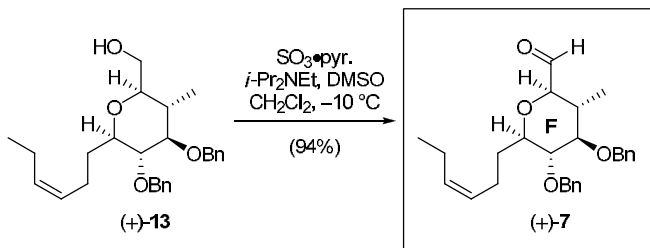

**Aldehyde (+)-7.** To a solution of alcohol (+)-**13** (35.0 g, 82.4 mmol, 1.0 equiv.) in methylene chloride (600 mL) at  $-10\text{ }^\circ\text{C}$  was added diisopropylethylamine (43.0 mL, 247 mmol, 3.0 equiv.), followed by DMSO (31.8 mL, 412 mmol, 5.0 equiv.) and sulfur trioxide/pyridine complex (39.4 g, 247 mmol, 3.0 equiv.). The reaction was stirred for 45 minutes at  $-10\text{ }^\circ\text{C}$  and allowed to warm slowly to  $-5\text{ }^\circ\text{C}$  over 1 hour. The reaction was quenched with saturated  $\text{NaHCO}_3$  (600 mL) and extracted three times with 400 mL portions of  $\text{CH}_2\text{Cl}_2$ . The combined organic extracts were washed with water (150 mL), brine (150 mL), and dried over sodium sulfate. After filtration and concentration, silica gel chromatography (90/10, Hex/EtOAc) provided the desired aldehyde (+)-**7** (33.4 g, 94%) as a colorless oil:  $[\alpha]_{\text{D}}^{20} +61.2$  ( $c$  1.86,  $\text{CHCl}_3$ ); IR (neat) 2962, 1740, 1453, 1359, 1096, 697  $\text{cm}^{-1}$ ;  $^1\text{H}$  NMR (500 MHz,  $\text{C}_6\text{D}_6$ )  $\delta$  9.40 (d,  $J = 2.5$  Hz, 1H), 7.29-7.08 (m, 3H), 5.47-5.37 (m, 2H), 4.75 (dd,  $J = 11.3, 5.6$  Hz, 2H), 4.46 (dd,  $J = 5.3, 8.1$  Hz, 2H), 3.20 (app dt,  $J = 2.6, 9.3$  Hz, 1H), 3.12-3.06 (m, 2H), 2.93 (dd,  $J = 8.7, 1.4$  Hz, 1H), 2.27 (m, 2H), 2.04 (m, 2H), 1.94 (m, 1H), 1.68 (m, 1H), 1.56 (m, 1H), 0.91 (t,  $J = 7.6$  Hz, 3H), 0.90 (t,  $J = 6.6$  Hz, 3H);  $^{13}\text{C}$  NMR (125 MHz,  $\text{CDCl}_3$ )  $\delta$  199.7, 138.2, 138.0, 132.5, 128.5, 128.4, 128.4, 128.2, 127.8, 127.8, 86.4, 84.3, 83.1, 78.4, 76.7, 75.7, 75.3, 38.2, 31.7, 22.9, 20.5, 14.3, 12.0; High resolution mass spectrum (+ESI)  $m/z$  445.2361 [(M+Na) $^+$ ; calcd for  $\text{C}_{27}\text{H}_{34}\text{O}_4\text{Na}$  445.2457].



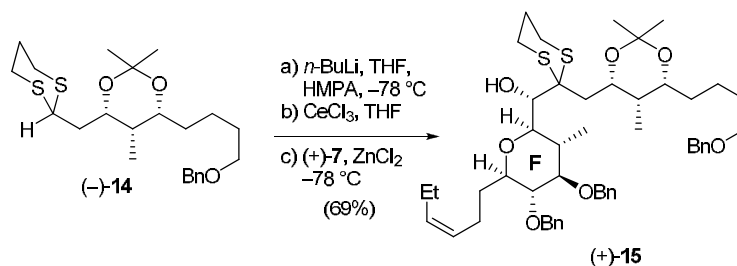

**Flask A:** A flame-dried flask was charged with anhydrous  $\text{CeCl}_3$  (16.9 g, 68.6 mmol, 3.5 equiv.), heated to  $110\text{ }^{\circ}\text{C}$  (oil bath temp) under high vacuum for 16 hours with vigorous stirring. The system was then purged with argon, charged with THF (100 mL) and the resulting white slurry was stirred vigorously for a further 2 hours.

**Flask B:** To a  $-78\text{ }^{\circ}\text{C}$  solution of dithiane (–)-14 (25.0 g, 58.9 mmol, 3.0 equiv.; dried under high vacuum for 16 hours) in THF (300 mL) and HMPA (16.4 mL, 88.2 mmol, 4.5 equiv.) was added *n*-BuLi (2.5 M in hexanes, 23.5 mL, 58.9 mmol, 3.0 equiv.) slowly via syringe over 1 hour. The resulting deep red solution was stirred at  $-78\text{ }^{\circ}\text{C}$  for 1 hour. The contents of *Flask A* were then added to *Flask B* via a thick gauge cannula, and the resulting red slurry was stirred at  $-78\text{ }^{\circ}\text{C}$  for 1.5 hours.

**Flask C:** To a  $-78\text{ }^{\circ}\text{C}$  solution of aldehyde (+)-7 (8.3 g, 19.6 mmol, 1.0 equiv.; dried under high vacuum for 16 hours) in THF (100 mL) was added  $\text{ZnCl}_2$  (1 M in  $\text{Et}_2\text{O}$ , 21.6 mL, 21.6 mmol, 1.1 equiv.). After stirring for 30 minutes, the  $-78\text{ }^{\circ}\text{C}$  bath was removed and the solution was transferred via cannula into *Flask B* over 30 minutes. The resulting yellow slurry was stirred at  $-78\text{ }^{\circ}\text{C}$  for 3 hours, then diluted with 300 mL diethyl ether, quenched with 200 mL of saturated  $\text{NH}_4\text{Cl}$  solution and allowed to warm to room temperature. The aqueous phase was extracted three times with 250 mL portions of diethyl ether, the combined organic phases were then washed twice with 150 mL water, and 150 mL of brine, dried over  $\text{Na}_2\text{SO}_4$ , filtered and concentrated. Flash column chromatography (Hex/ $\text{EtOAc}$ , 95/5 to 90/10 to 85/15) afforded alcohol (+)-15 (11.4 g, 69%) as a pale yellow oil:  $[\alpha]_{\text{D}}^{20} +1.9$  (c 0.7,  $\text{CHCl}_3$ ); IR (neat) 3356, 3029, 2934, 2859, 1454, 1387, 1358, 1270, 1094  $\text{cm}^{-1}$ ;  $^1\text{H}$  NMR (500 MHz,  $\text{CDCl}_3$ )  $\delta$  7.34-7.27 (m, 15H), 5.37-5.34 (m, 2H), 4.91 (d,  $J =$

11.0 Hz, 1H), 4.86 (d,  $J = 10.9$  Hz, 1H), 4.66 (d,  $J = 2.3$  Hz, 1H), 4.64 (d,  $J = 2.1$  Hz, 1H), 4.50 (s, 2H), 4.43 (d,  $J = 8.2$  Hz, 1H), 4.33 (d,  $J = 10.2$  Hz, 1H), 3.91 (d,  $J = 10.1$  Hz, 2H), 3.71 (d,  $J = 10.1$  Hz, 1H), 3.46 (t,  $J = 6.5$  Hz, 2H), 3.33-3.30 (m, 1H), 3.23 (m, 2H), 2.81-2.67 (m, 5H), 2.31-2.28 (m, 1H), 2.23-2.20 (m, 1H), 2.11-1.95 (m, 6H), 1.86-1.84 (m, 1H), 1.67-1.61 (m, 2H), 1.56-1.47 (m, 2H), 1.46 (s, 3H), 1.37 (s, 3H), 1.35-1.33 (m, 4H), 1.02 (d,  $J = 6.5$  Hz, 3H), 0.94 (t,  $J = 5.2$  Hz, 3H), 0.87 (d,  $J = 6.8$  Hz, 3H);  $^{13}\text{C}$  NMR (125 MHz,  $\text{CDCl}_3$ )  $\delta$  138.6, 138.5, 138.3, 132.0, 128.8, 128.4, 128.3, 127.8, 127.7, 127.7, 127.6, 127.6, 127.5, 127.5, 99.2, 86.5, 83.2, 78.9, 78.4, 75.1, 74.9, 73.4, 72.8, 72.4, 70.6, 70.1, 57.4, 40.3, 39.2, 36.7, 32.3, 31.9, 29.8, 29.6, 26.2, 25.9, 25.1, 23.5, 22.0, 20.6, 19.4, 14.4, 13.3, 5.0; High resolution mass spectrum (+ESI)  $m/z$  869.4432 [(M+Na) $^+$ ]; calcd for  $\text{C}_{50}\text{H}_{70}\text{O}_7\text{S}_2\text{Na}$  869.4563].

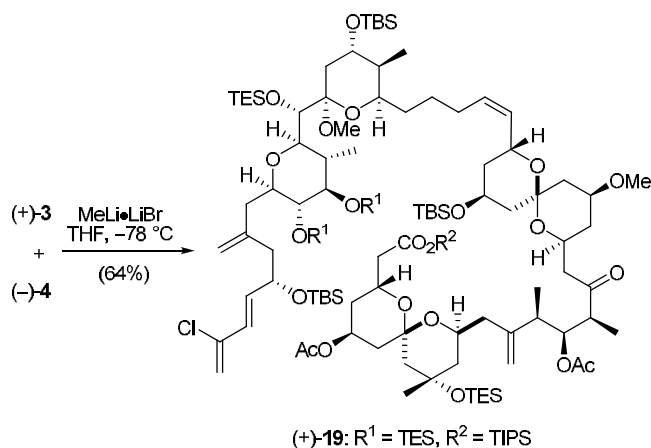

**Alkene (+)-19.** To a flame dried round bottom containing activated 4Å molecular sieves was added THF. The THF was degassed using the freeze-pump-thaw method (3X) before use in the pending reaction. To a  $-78$  °C solution of Wittig salt (+)-3 [azeotroped with benzene 3X then dried on high vacuum at  $50$  °C for 18 hours before use] (454 mg, 0.304 mmol, 1.4 equiv.) in THF (3.0 mL) was added MeLi as a complex with LiBr (1.3 M in ether, 0.25 mL, 0.320 mmol, 1.4 equiv.) dropwise and the resulting orange solution was allowed to stir for 30 minutes. A solution of aldehyde (-)-4

[azeotroped with benzene 3X then dried on high vacuum at room temperature for 2 hours before use] (237 mg, 0.21 mmol, 1.0 equiv.) in THF (3.0 mL) was added dropwise via cannula. The flask which had contained the aldehyde was then rinsed with THF (1.5 mL) and the solution was transferred to the reaction flask dropwise via cannula. The resulting mixture was allowed to stir for an additional hour at  $-78\text{ }^{\circ}\text{C}$  then warmed to room temperature over 2 hours. The resulting red solution was diluted with ether (15 mL) and then quenched by the addition of 10 mL of a saturated  $\text{NH}_4\text{Cl}$ /saturated  $\text{Na}_2\text{S}_2\text{O}_3$  (4/1) solution. The aqueous phase was extracted three times with ether (15 mL) and the combined organic phases washed with saturated  $\text{NaCl}$  (10 mL), dried ( $\text{Na}_2\text{SO}_4$ ), filtered and concentrated *in vacuo*. Flash chromatography using ethyl acetate/hexanes (10/90 to 30/70) as an elutant afforded Wittig product (+)-**19** (412 mg, 64%). Subsequent elution with methanol/methylene chloride (5/95) allowed for recovery of the excess EF Wittig salt (+)-**3**.  $[\alpha]_{\text{D}}^{25} +4.6$  (c 1.0,  $\text{C}_6\text{H}_6$ ); IR (thin film) 2953, 1733, 1464, 1370, 1251, 1111  $\text{cm}^{-1}$ ;  $^1\text{H}$  NMR (500 MHz,  $\text{C}_6\text{D}_6$ )  $\delta$  6.48 (dd,  $J = 14.8, 5.1$  Hz, 1H), 6.40 (d,  $J = 14.8$  Hz, 1H), 5.72 (m, 1H), 5.59 (m, 2H), 5.50 (m, 1H), 5.15 (s, 2H), 5.09 (s, 2H), 5.05 (s, 1H), 5.01 (s, 1H), 4.97 (s, 1H), 4.49 (m, 2H), 4.27 (m, 2H), 4.18 (br t,  $J = 10.2$  Hz, 1H), 3.92 (br s, 2H), 3.90 (s, 1H), 3.48-3.37 (m, 3H), 3.31-3.25 (m, 2H), 3.16 (s, 3H), 3.09 (m, 1H), 3.05 (s, 3H), 2.96-2.89 (m, 2H), 2.79 (d,  $J = 13.6$  Hz, 1H), 2.74 (dd,  $J = 18.5, 10.0$  Hz, 1H), 2.66 (d,  $J = 6.9$  Hz, 1H), 2.62 (dd,  $J = 13.3, 5.8$  Hz, 1H), 2.57-2.30 (m, 8H), 2.21 (dd,  $J = 13.2, 9.5$  Hz, 1H), 2.11 (m, 3H), 1.95 (br s, 2H), 1.92 (s, 3H), 1.78 (s, 3H), 1.76-1.55 (m, 8H), 1.48-1.19 (m, 13H), 1.17-1.12 (m, 29H), 1.08-0.98 (m, 36H), 0.85-0.75 (m, 6H), 0.67-0.57 (m, 6H), 0.28 (s, 9H), 0.25 (s, 9H), 0.22 (s, 3H), 0.18 (s, 9H), 0.13 (s, 3H), 0.09 (s, 6H);  $^{13}\text{C}$  NMR (125 MHz,  $\text{C}_6\text{D}_6$ )  $\delta$  209.5, 170.6, 170.1, 168.6, 147.9, 144.2, 138.8, 138.7, 132.2, 130.9, 126.4, 115.3, 115.1, 113.7, 101.5, 98.3, 97.1, 81.0, 80.3, 78.6, 77.9, 74.7, 73.8, 71.9, 71.3, 71.2, 70.7, 67.6, 66.9, 66.6, 65.3, 64.5, 62.3, 61.7, 55.1, 51.1, 47.9, 47.0, 46.6, 45.5, 44.5, 42.9, 42.7, 40.7, 40.0, 39.4, 38.9, 38.8, 38.4, 38.0, 35.0, 34.5, 33.0, 32.1, 30.4, 30.1, 28.7, 26.8, 26.2, 26.1, 21.3, 20.5, 18.4, 18.3, 18.0, 15.2, 13.8, 12.3, 12.1, 10.7, 7.6,

7.5, 7.3, 6.1, 1.7, 1.6, 0.36, 4.2, 4.5, 4.8, 4.9; high resolution mass spectrum (+ESI)  $m/z$  2106.2068 [(M+Na)<sup>+</sup>; calcd for C<sub>106</sub>H<sub>199</sub>ClO<sub>22</sub>NaSi<sub>8</sub> 2106.2194].

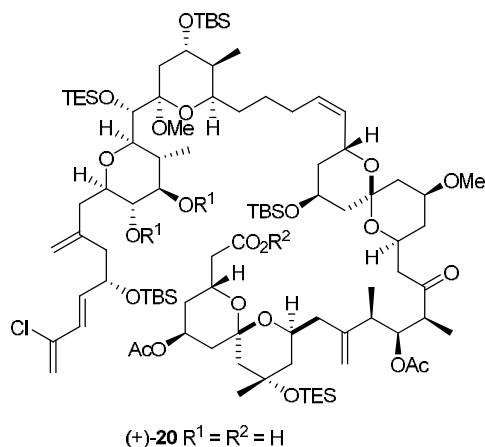

**Seco-acid (+)-20.** To a solution of Wittig product (+)-**19** (412 mg, 0.187 mmol, 1 equiv.) in THF (10.8 mL) cooled to 0 °C was added TBAF (1M in THF, 0.56 mL, 0.56 mmol, 3 equiv.) over 1 hour via syringe pump. After an additional 2 hours at 0 °C, the reaction mixture was diluted with ether (25 mL) and washed with 1M KHSO<sub>4</sub> (15 mL) then brine (15 mL). The combined aqueous phases were then extracted twice with ether (25 mL). The combined organic phases were dried (Na<sub>2</sub>SO<sub>4</sub>), filtered and concentrated *in vacuo*. Flash chromatography using ethyl acetate/hexanes (20/80 to 40/60) with 0.5 % AcOH as an elutant [the collection flask was diluted with 50 mL of toluene before concentrating to avoid the *seco*-acid being exposed to neat AcOH] afforded *seco*-acid (+)-**20** (249 mg, 73%). [ $\alpha$ ]<sub>D</sub><sup>25</sup> +6.52 (*c* 1.4, C<sub>6</sub>H<sub>6</sub>); IR (thin film) 3447, 2953, 2856, 1733, 1464, 1372, 1250, 1110 cm<sup>-1</sup>; <sup>1</sup>H NMR (500 MHz, C<sub>6</sub>D<sub>6</sub>) δ 6.44 (dd, *J* = 14.9, 4.9 Hz, 1H), 6.38 (d, *J* = 15.0 Hz, 1H), 5.71 (m, 1H), 5.59 (dd, *J* = 9.5, 2.6 Hz, 1H), 5.57-5.48 (m, 2H), 5.18 (s, 1H), 5.14 (s, 2H), 5.11 (s, 1H), 5.06 (s, 1H), 4.97 (s, 1H), 4.48-4.42 (m, 2H), 4.30-4.26 (m, 2H), 4.17 (m, 1H), 3.95 (m, 1H), 3.92 (s, 2H), 3.37-3.34 (m, 2H), 3.28-3.20 (m, 2H), 3.18 (s, 3H), 3.10 (dd, *J* = 18.4, 2.9 Hz, 1H), 3.05 (s, 3H), 3.03-2.99 (m, 1H), 2.84 (dd, *J* = 18.4, 5.1 Hz, 1H), 2.76-2.69 (m, 2H), 2.60 (dd, *J* = 16.1, 6.4 Hz, 1H), 2.56-2.51 (m, 1H), 2.50-2.31 (m, 10H), 2.26-2.19 (m, 3H), 1.94 (s, 3H), 1.90-1.83 (m, 2H), 1.81 (s, 3H), 1.78-1.55 (m, 12H), 1.53-1.41 (m, 3H), 1.37 (s, 2H), 1.29 (d, *J* = 6.9, 3H), 1.23 (d, *J* = 7.0

Hz, 3H), 1.15 (t,  $J = 8.0$  Hz, 9H), 1.09-0.99 (m, 45H), 0.85-0.75 (m, 6H), 0.66-0.59 (m, 6H), 0.23 (s, 3H), 0.14 (s, 3H), 0.13 (s, 3H), 0.10 (s, 3H), 0.09 (s, 6H);  $^{13}\text{C}$  NMR (125 MHz,  $\text{C}_6\text{D}_6$ )  $\delta$  209.5, 172.5, 170.4, 169.0, 147.9, 143.7, 138.9, 138.8, 132.1, 130.9, 126.4, 115.8, 115.1, 113.7, 101.7, 98.4, 97.4, 79.2, 78.9, 78.8, 75.8, 75.0, 73.9, 72.2, 71.2, 71.2, 70.8, 67.4, 67.0, 66.8, 66.6, 65.2, 64.3, 62.4, 61.5, 55.1, 51.2, 48.0, 47.9, 47.0, 46.3, 45.4, 44.2, 42.8, 40.6, 39.5, 39.3, 39.0, 38.8, 38.7, 38.4, 37.9, 35.1, 34.3, 32.9, 32.1, 30.6, 30.4, 28.5, 26.6, 26.2, 21.3, 20.6, 18.5, 13.9, 12.4, 10.7, 7.6, 7.6, 7.2, 6.2, 1.3, -4.1, -4.3, -4.5, -4.6, -4.80; High resolution mass spectrum (+ESI)  $m/z$  1848.0687 [(M+Na) $^+$ ]; calcd for  $\text{C}_{94}\text{H}_{169}\text{ClO}_{22}\text{NaSi}_5$  1848.0640].

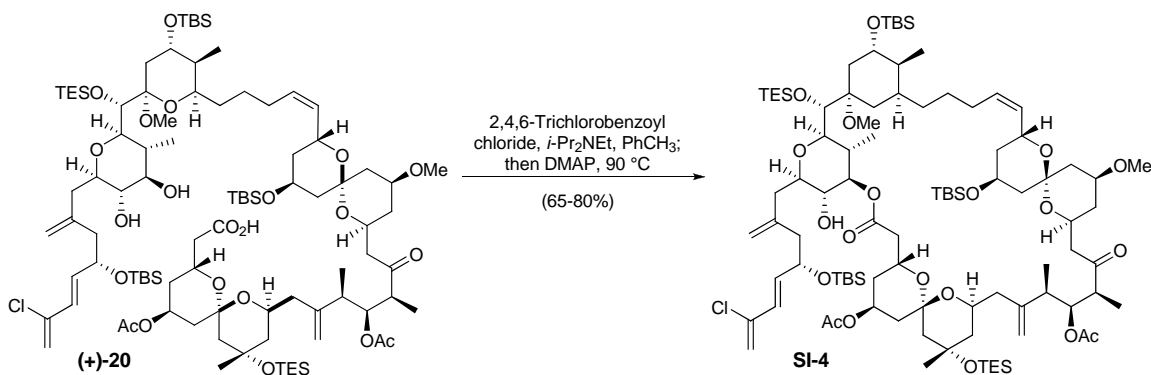

**Macrocycle SI-4.** To a solution of *seco*-acid (+)-**20** (180.0 mg, 0.099 mmol, 1.0 equiv.) in toluene (9.0 mL) was added *i*-Pr<sub>2</sub>NEt (1.03 mL, 5.91 mmol, 60 equiv.) and 2,4,6-trichlorobenzoyl chloride (0.31 mL, 1.98 mmol, 20 equiv.) at room temperature under argon. The reaction mixture was stirred at ambient temperature for 4 hours, and diluted with additional toluene (28.3 mL). This solution was added via syringe pump (100 mL gas-tight glass syringe) to a solution of DMAP (605 mg, 4.95 mmol, 50 equiv.) in toluene (146 mL) at 90 °C over 24 h. The flask was rinsed with 9.9 mL toluene and this solution was added via the same syringe over 12 hours. The flask containing the *seco*-acid was rinsed a second time with 6.6 mL of toluene and this solution was added via syringe pump over 4 hours. After stirring for an additional 9 hours, the reaction mixture was cooled to room temperature, and diluted with 120 mL of diethyl ether. The reaction was then quenched by the addition of 120 mL of saturated NaHCO<sub>3</sub> solution and extracted. The aqueous phase was extracted

twice with 120 mL portions of EtOAc and the combined organic solutions were washed with brine, dried over Na<sub>2</sub>SO<sub>4</sub>, and concentrated. Silica gel chromatography, using a gradient of EtOAc/Hex (10/90 to 40/60) as eluant, provided 132 mg (74%; 81% on 24.0 mg scale) of the macrolide as a colorless oil.  $[\alpha]_D^{25} +21.5$  (*c* 1.05, C<sub>6</sub>D<sub>6</sub>); IR (thin film) 3482, 2931, 1751, 1733, 1652, 1590, 1464, 1373, 1252, 1112, 962, 836, 742 cm<sup>-1</sup>; <sup>1</sup>H NMR (500 MHz, C<sub>6</sub>D<sub>6</sub>) δ 6.43 (dd, *J* = 14.9, 5.1 Hz, 1H), 6.37 (d, *J* = 15.0 Hz, 1H), 5.76 (dd, *J* = 11.2, 6.9 Hz, 1H), 5.61 (dd, *J* = 10.4, 1.5 Hz, 1H), 5.46 (m, 1H), 5.37 (m, 1H), 5.17 (s, 1H), 5.15 (s, 1H), 5.08 (s, 1H), 5.05 (s, 1H), 5.04 (s, 1H), 4.94 (m, 2H), 4.83 (dd, *J* = 10.4, 8.8 Hz, 1H), 4.50 (m, 1H), 4.43 (dd, *J* = 12.1, 6.0 Hz, 1H), 4.37-4.35 (m, 2H), 4.12 (m, 1H), 4.00 (s, 1H), 3.94-3.91 (m, 2H), 3.51 (d, *J* = 10.4 Hz, 1H), 3.44-3.41 (m, 2H), 3.37 (s, 3H), 3.27 (m, 2H), 3.16-3.12 (m, 1H), 3.10-3.05 (m, 2H), 3.04 (s, 3H), 2.89-2.84 (m, 2H), 2.73-2.68 (m, 1H), 2.58-2.50 (m, 5H), 2.38-2.29 (m, 4H), 2.23-2.16 (m, 2H), 2.08 (m, 1H), 2.01-2.00 (m, 2H), 1.99 (s, 3H), 1.85 (s, 3H), 1.80-1.59 (m, 12H), 1.52-1.42 (m, 3H), 1.39 (d, *J* = 6.8 Hz, 3H), 1.33 (d, *J* = 6.9 Hz, 3H), 1.20 (t, *J* = 8.0 Hz, 10H), 1.12-1.10 (m, 13H), 1.04-0.99 (m, 33H), 0.89-0.79 (m, 6H), 0.62-0.57 (m, 7H), 0.21 (s, 3H), 0.14 (s, 3H), 0.13 (s, 3H), 0.09 (s, 3H), 0.07 (s, 3H), 0.06 (s, 3H); <sup>13</sup>C NMR (125 MHz, C<sub>6</sub>D<sub>6</sub>) δ 208.9, 171.5, 170.3, 168.5, 147.9, 143.4, 138.9, 138.8, 132.7, 129.9, 126.4, 116.0, 115.1, 113.5, 101.7, 98.5, 97.0, 81.1, 80.1, 78.6, 75.0, 74.0, 73.4, 72.3, 71.8, 71.4, 70.4, 67.2, 66.6, 66.2, 65.3, 63.7, 63.4, 60.6, 55.2, 52.2, 48.3, 47.7, 47.6, 46.6, 45.6, 43.9, 43.4, 40.9, 39.8, 39.2, 38.9, 38.4, 38.0, 36.8, 36.3, 34.4, 32.6, 32.3, 30.4, 27.9, 26.2, 26.1, 21.4, 21.0, 20.6, 18.5, 18.4, 18.3, 14.4, 14.2, 12.9, 10.8, 7.6, 7.5, 7.2, 6.2, 4.1, 4.3, 4.5, 4.7, 4.9; High resolution mass spectrum (+ESI) *m/z* 1829.8524 [(M+Na)<sup>+</sup>; calcd for C<sub>94</sub>H<sub>167</sub>ClO<sub>21</sub>NaSi<sub>5</sub> 1830.0433].

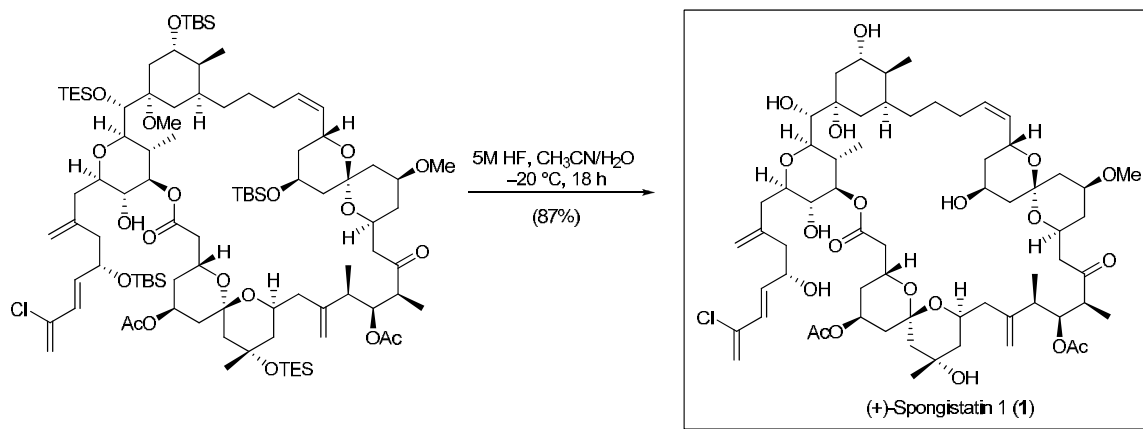

**(+)-Spongistatin 1.** To macrolactone (130 mg, 0.071 mmol) in acetonitrile (5.1 mL) cooled to  $-20\ ^\circ C$  was added a freshly prepared solution of aqueous HF in acetonitrile (5.1 mL) via syringe pump over 2 hours. [HF solution prepared by dilution of aqueous HF (48%, 2.5 mL) with acetonitrile (10 mL)] Following addition, the reaction mixture was allowed to stir for an additional 18 hours at  $-20\ ^\circ C$ . The reaction was quenched by the dropwise addition of  $Et_3N$  (6.5 mL). The reaction mixture was then warmed to room temperature, at which point it was diluted with a 2:1 mixture of ethyl acetate and methylene chloride (60 mL) and washed with saturated  $NaHCO_3$  (60 mL) then brine (60 mL). The aqueous layers were extracted twice with ethyl acetate and methylene chloride (2:1, 60 mL). The combined organic layers were dried ( $Na_2SO_4$ ), filtered and concentrated. Column chromatography using methanol/methylene chloride (1:99.5:95) as an eluant afforded (+)-spongistatin 1 (76 mg, 87%; 93% on 180 mg scale) as a white amorphous solid with spectral data matching our previous reports.<sup>8</sup>

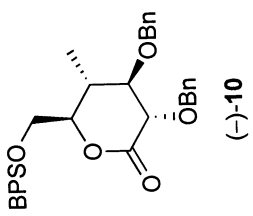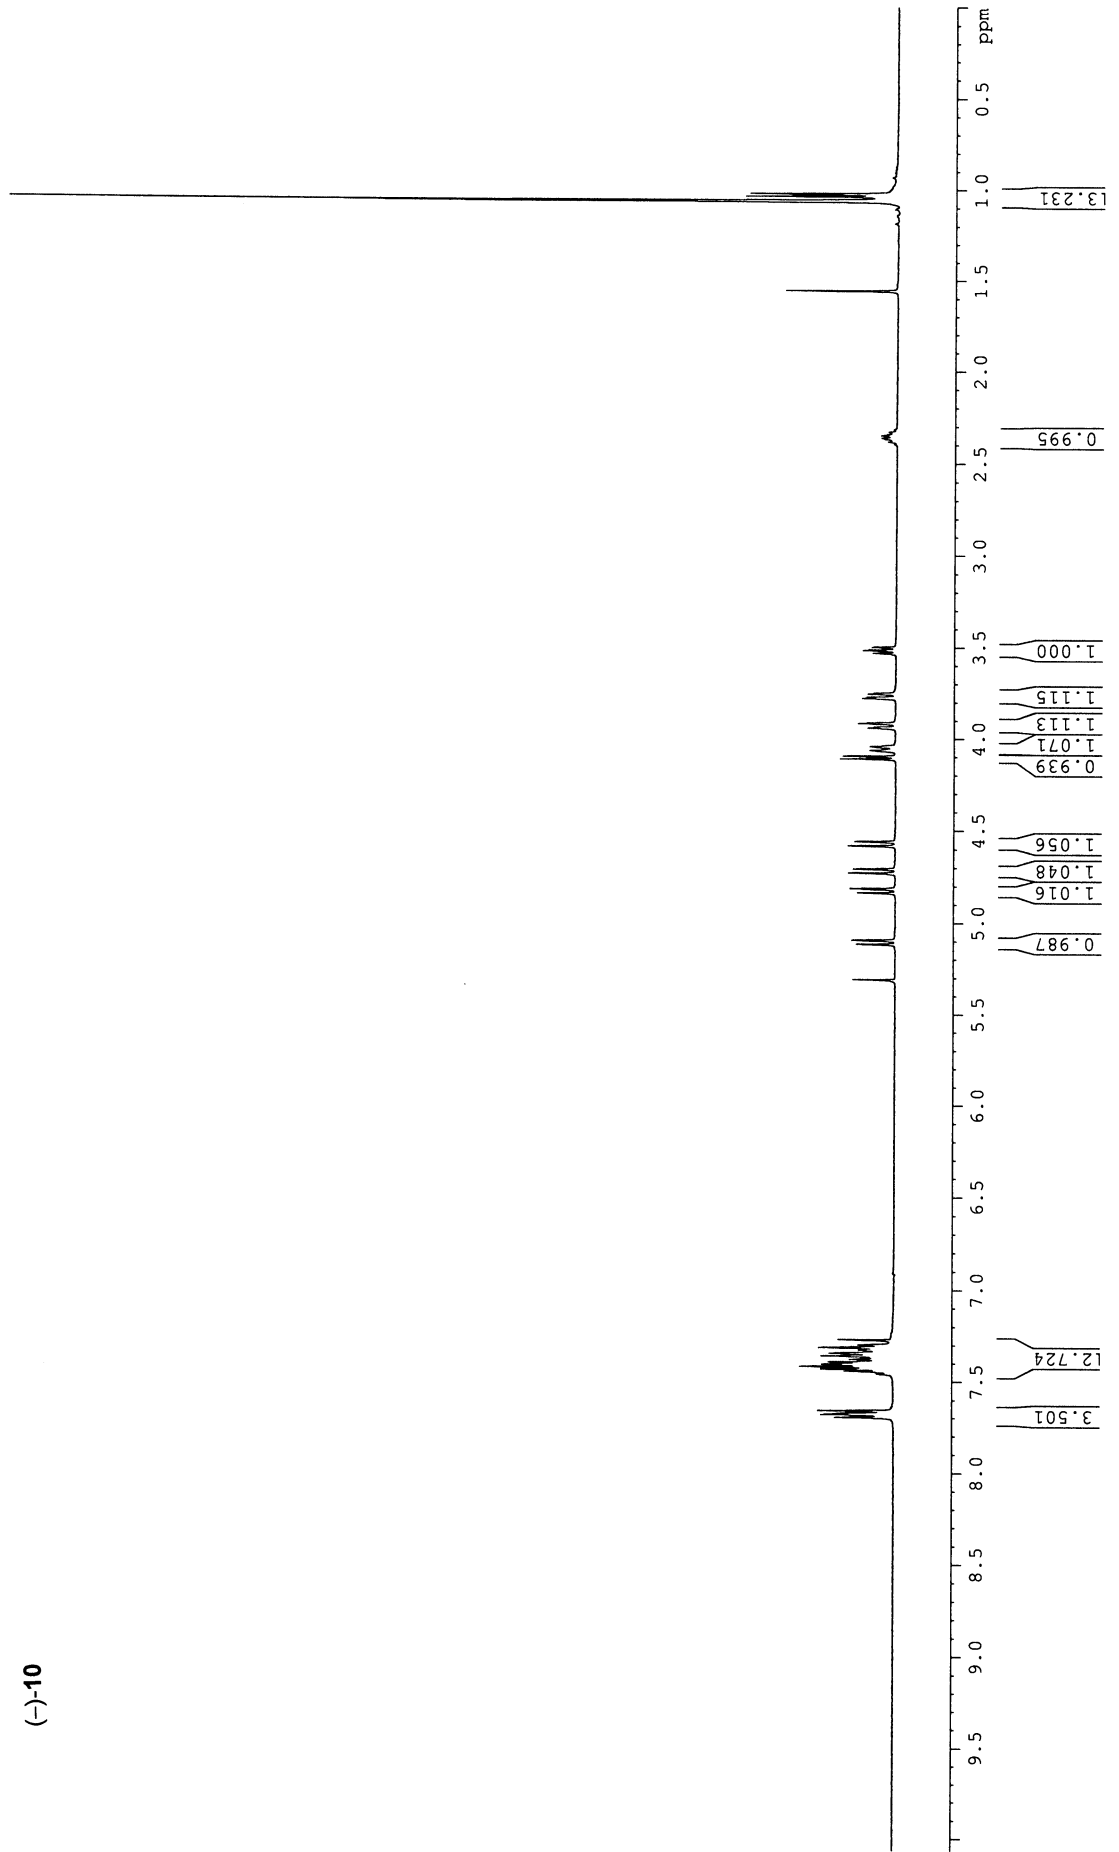



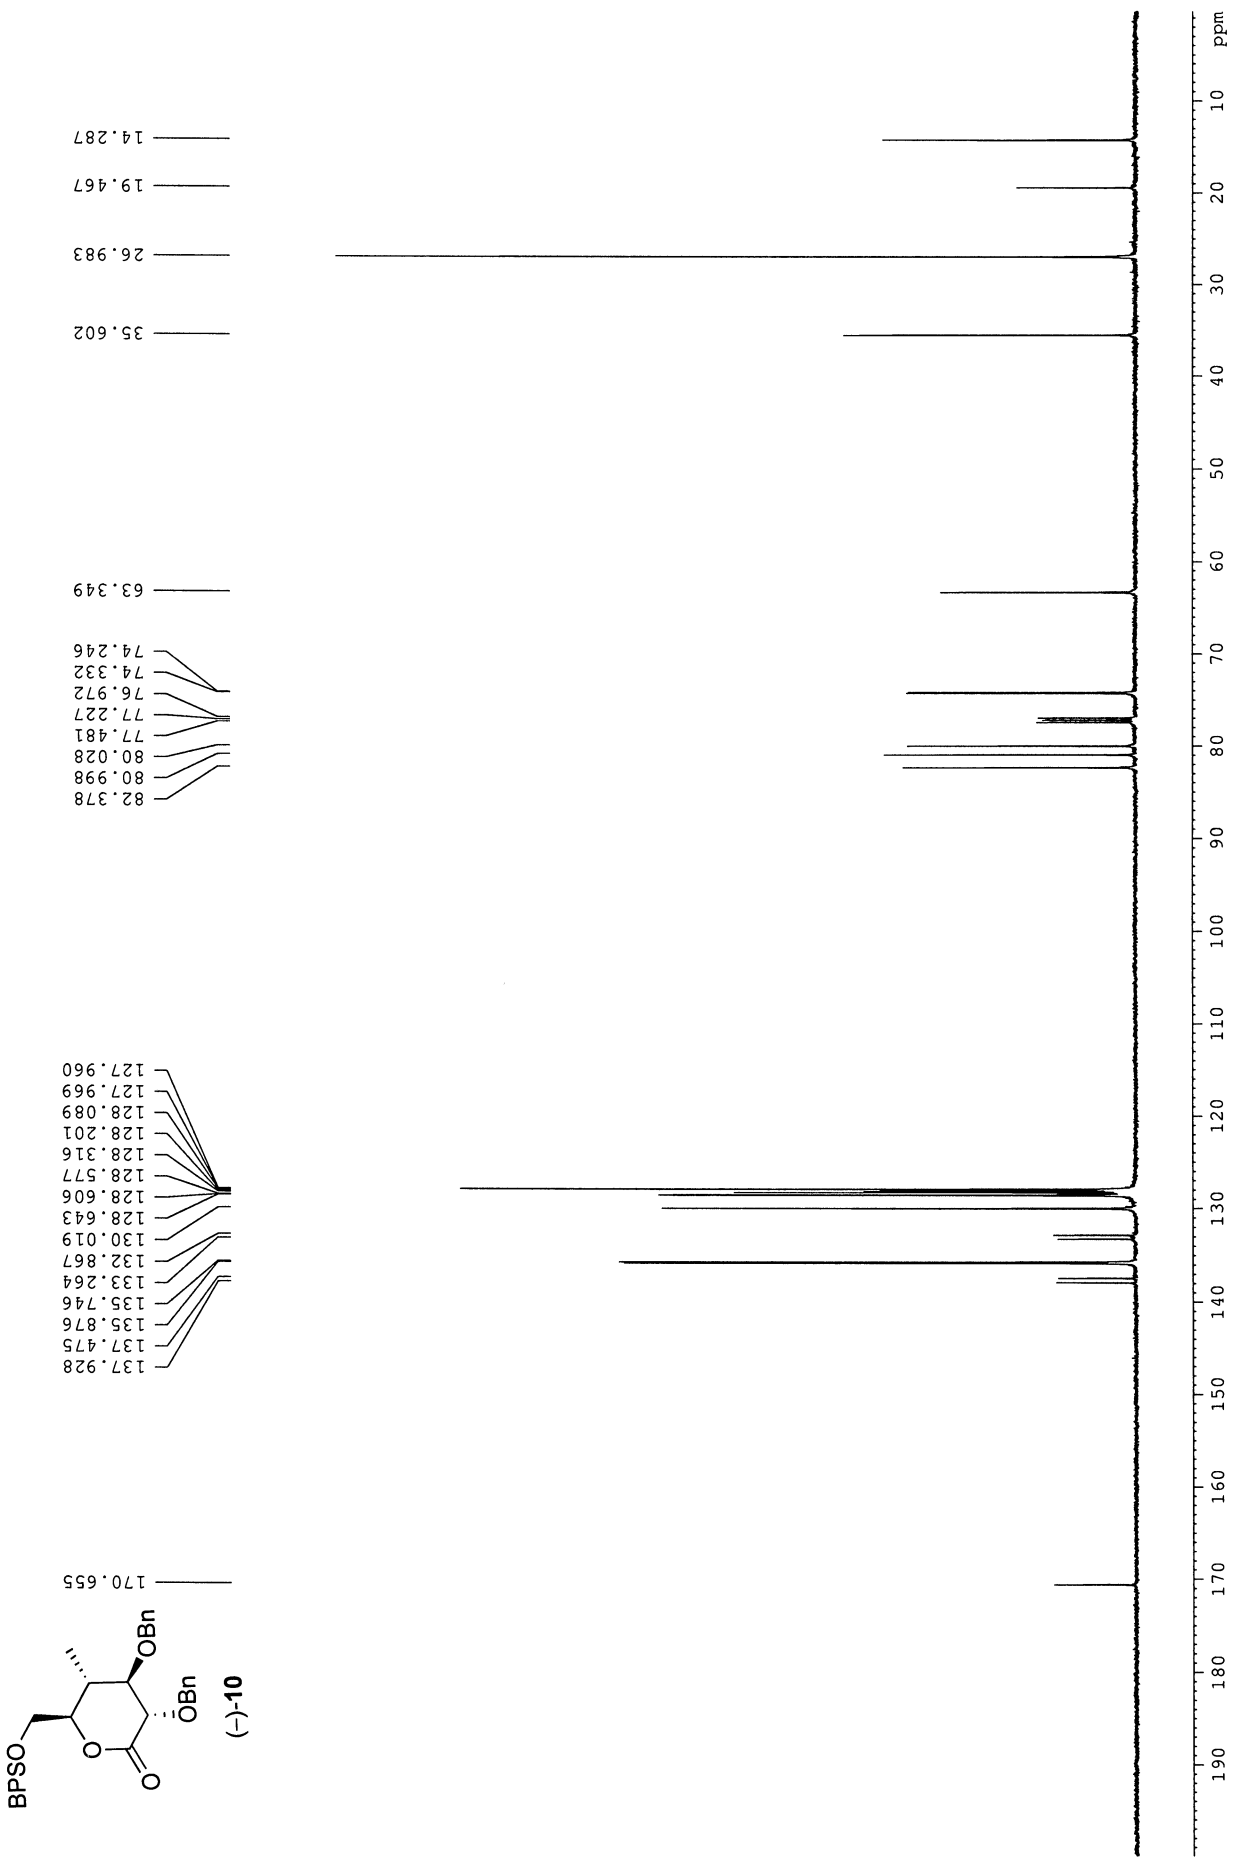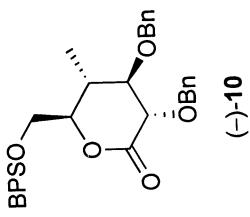

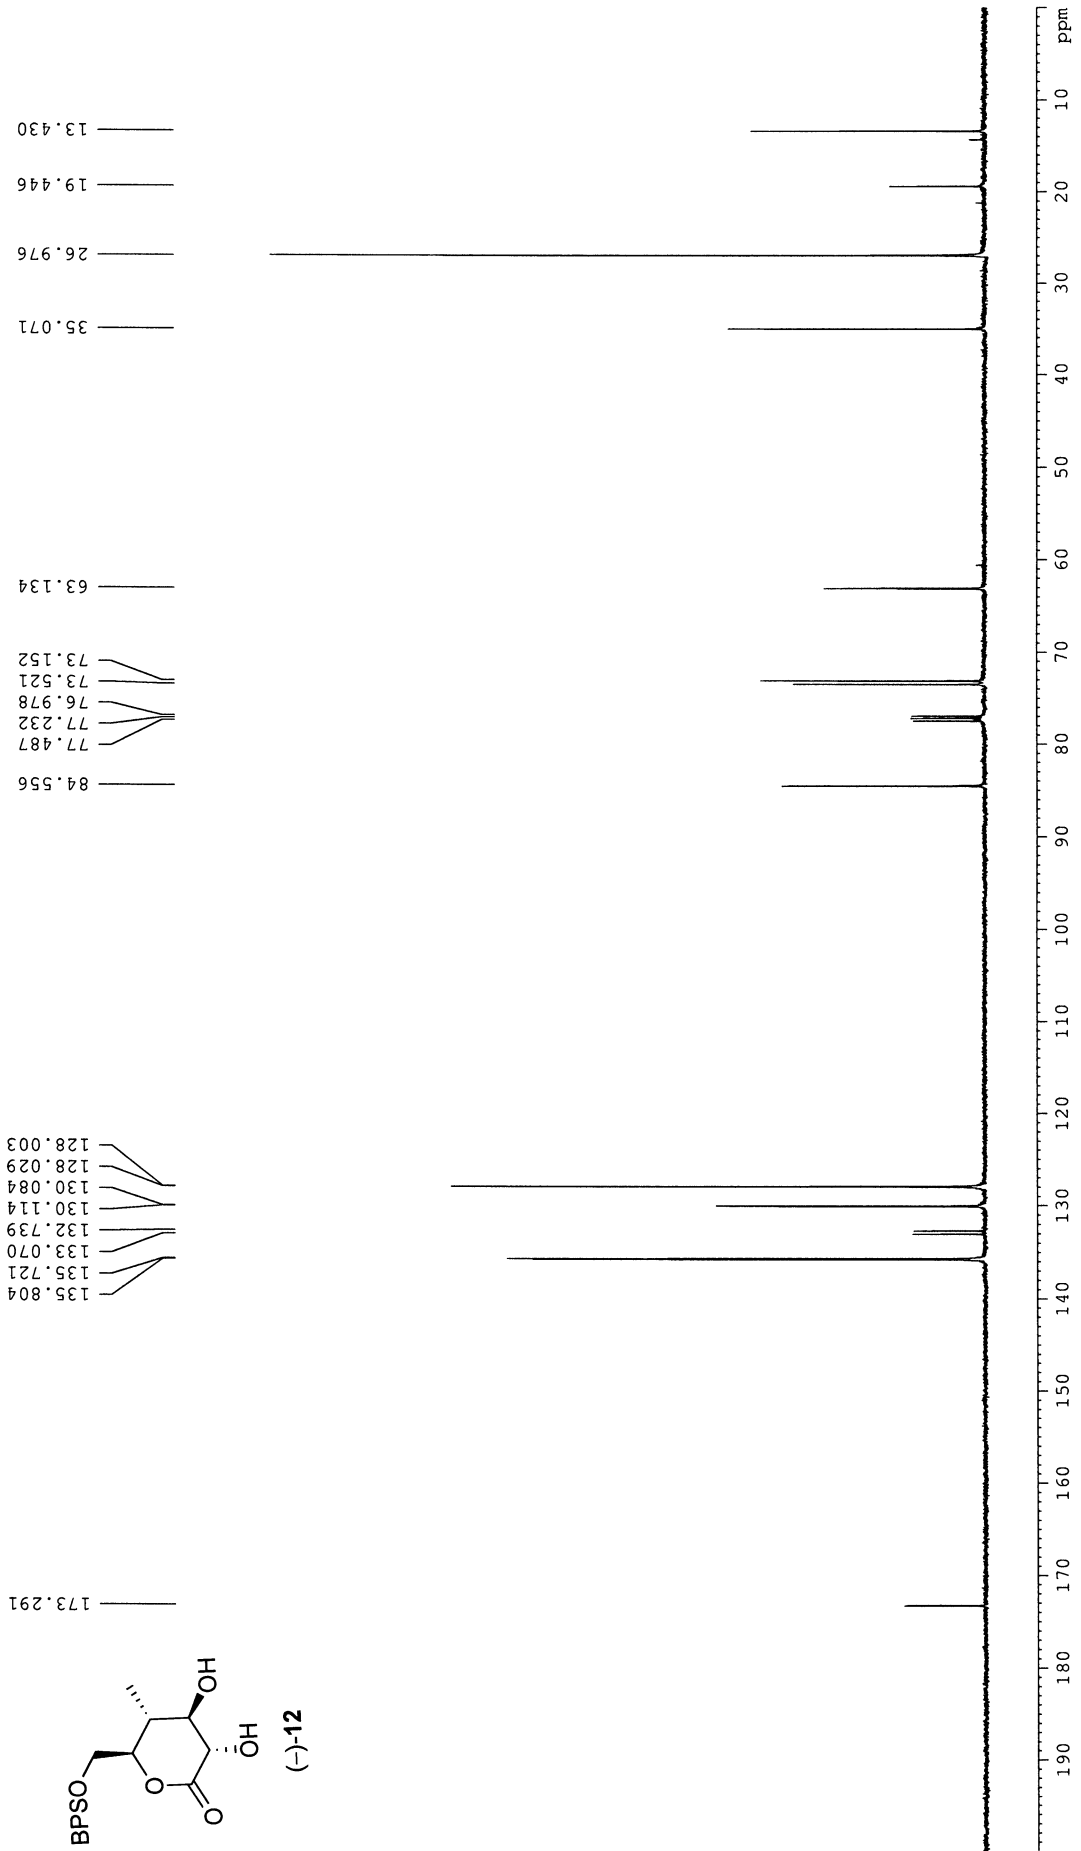

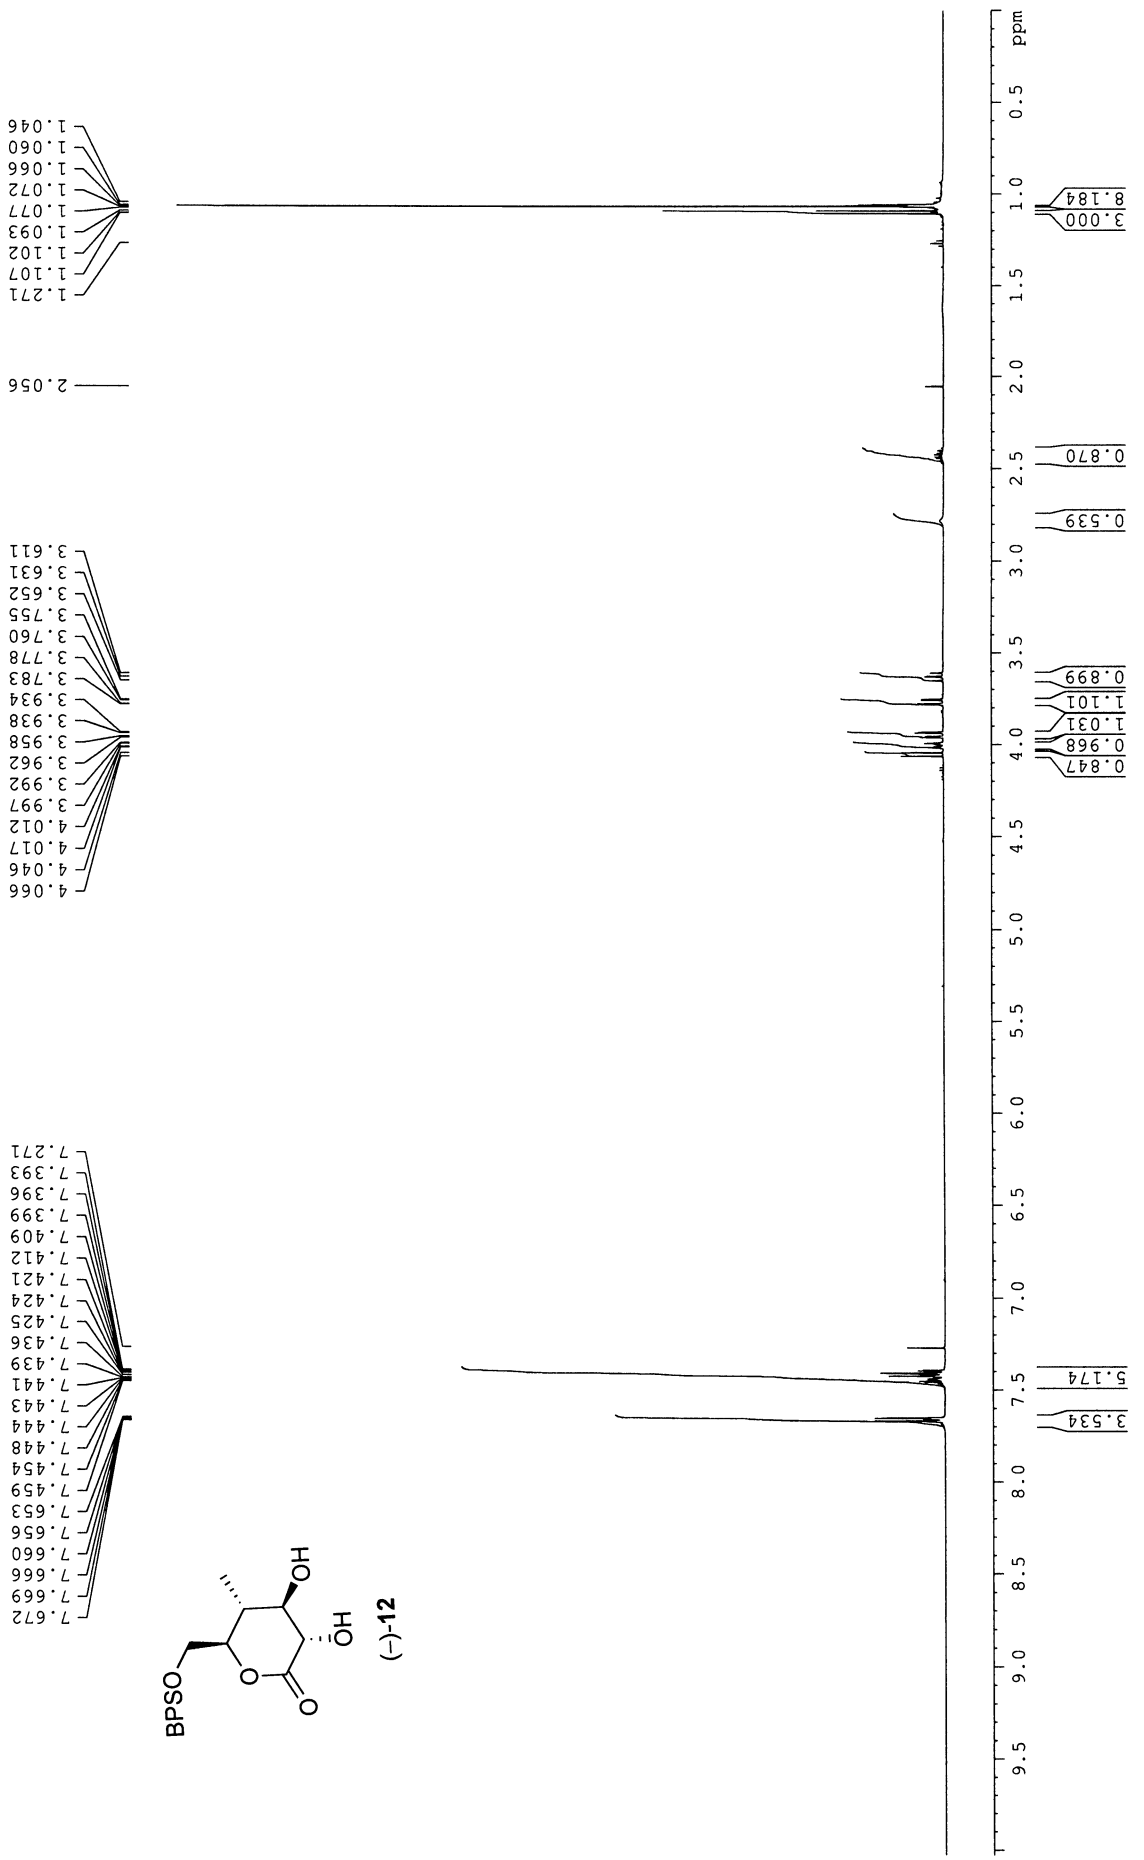

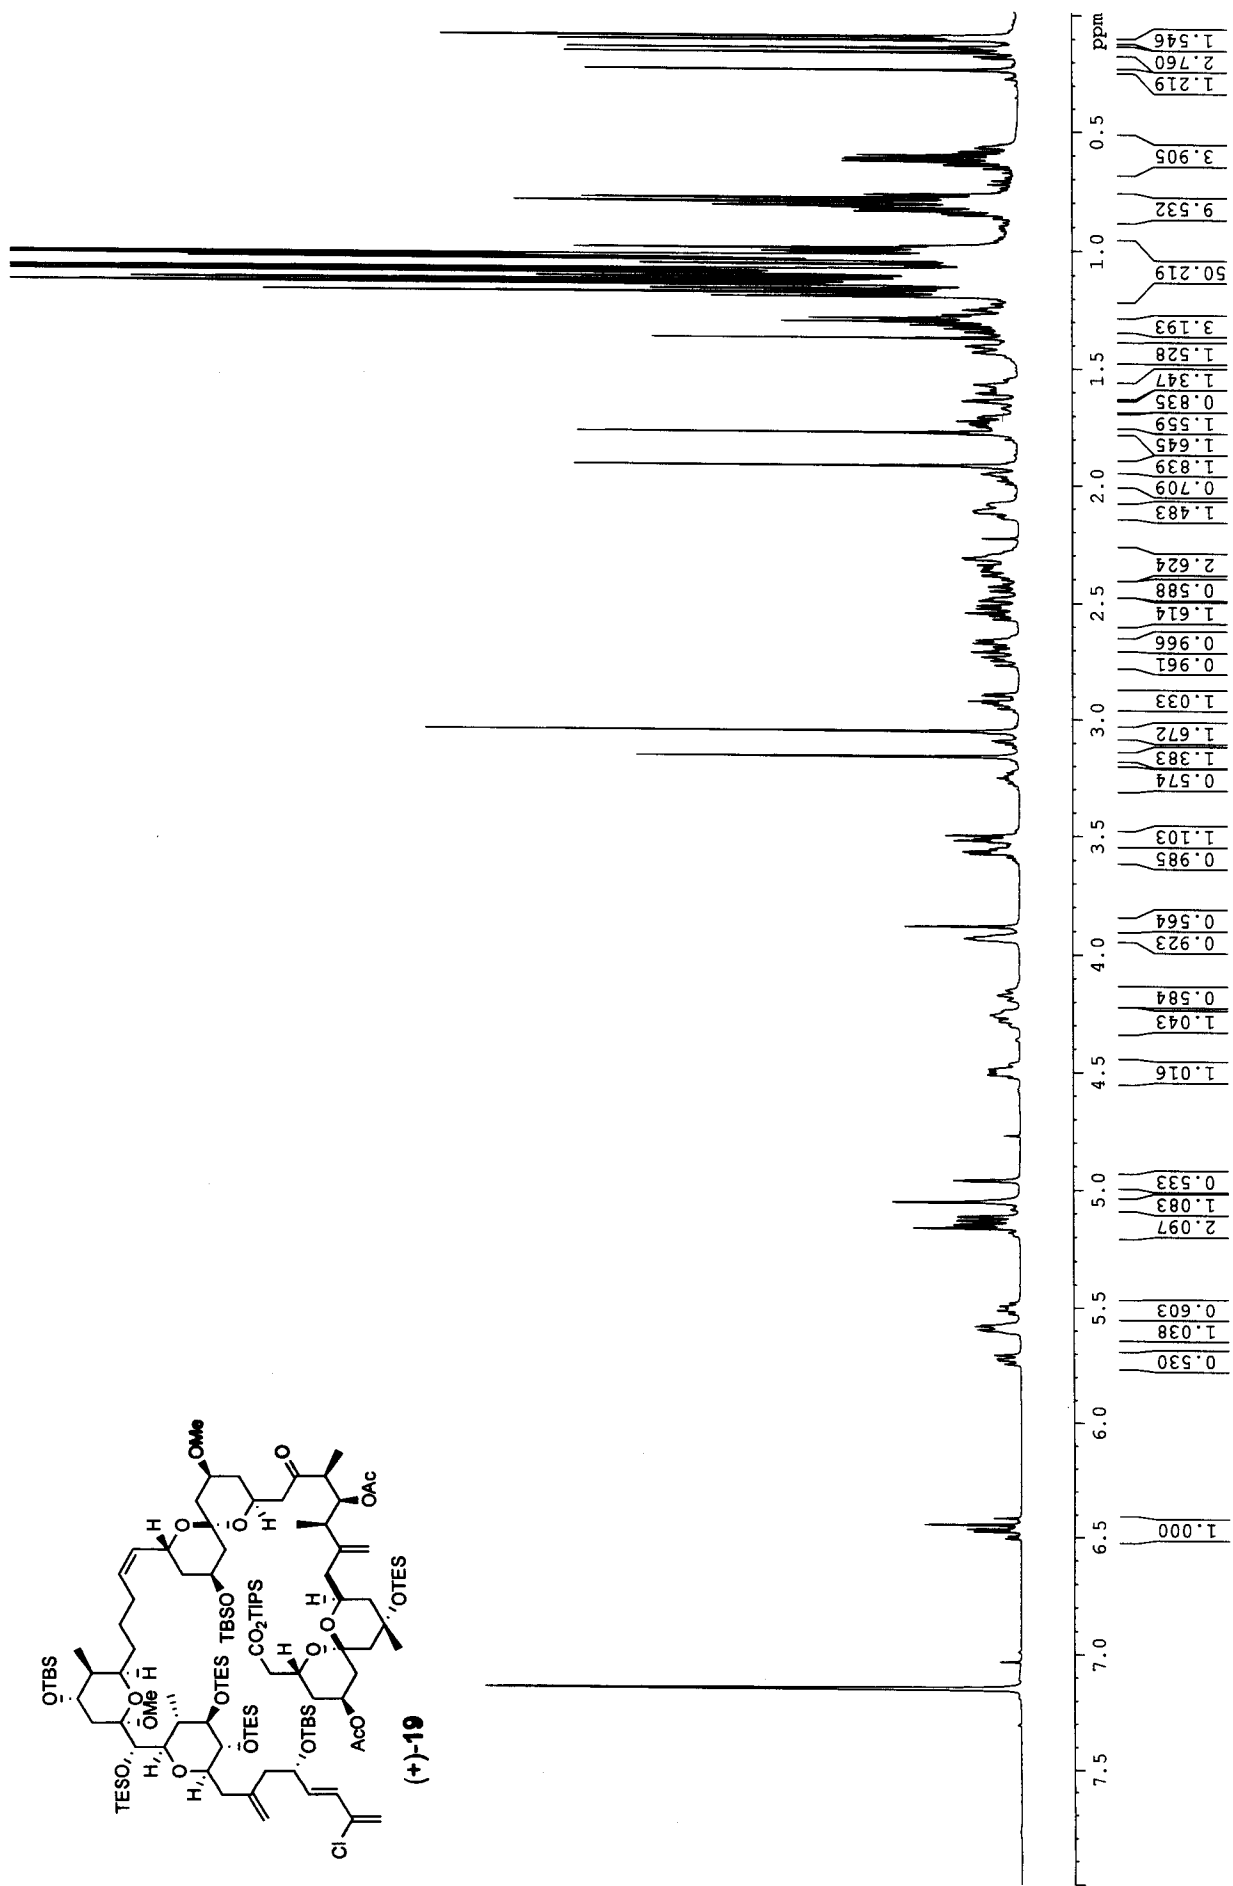

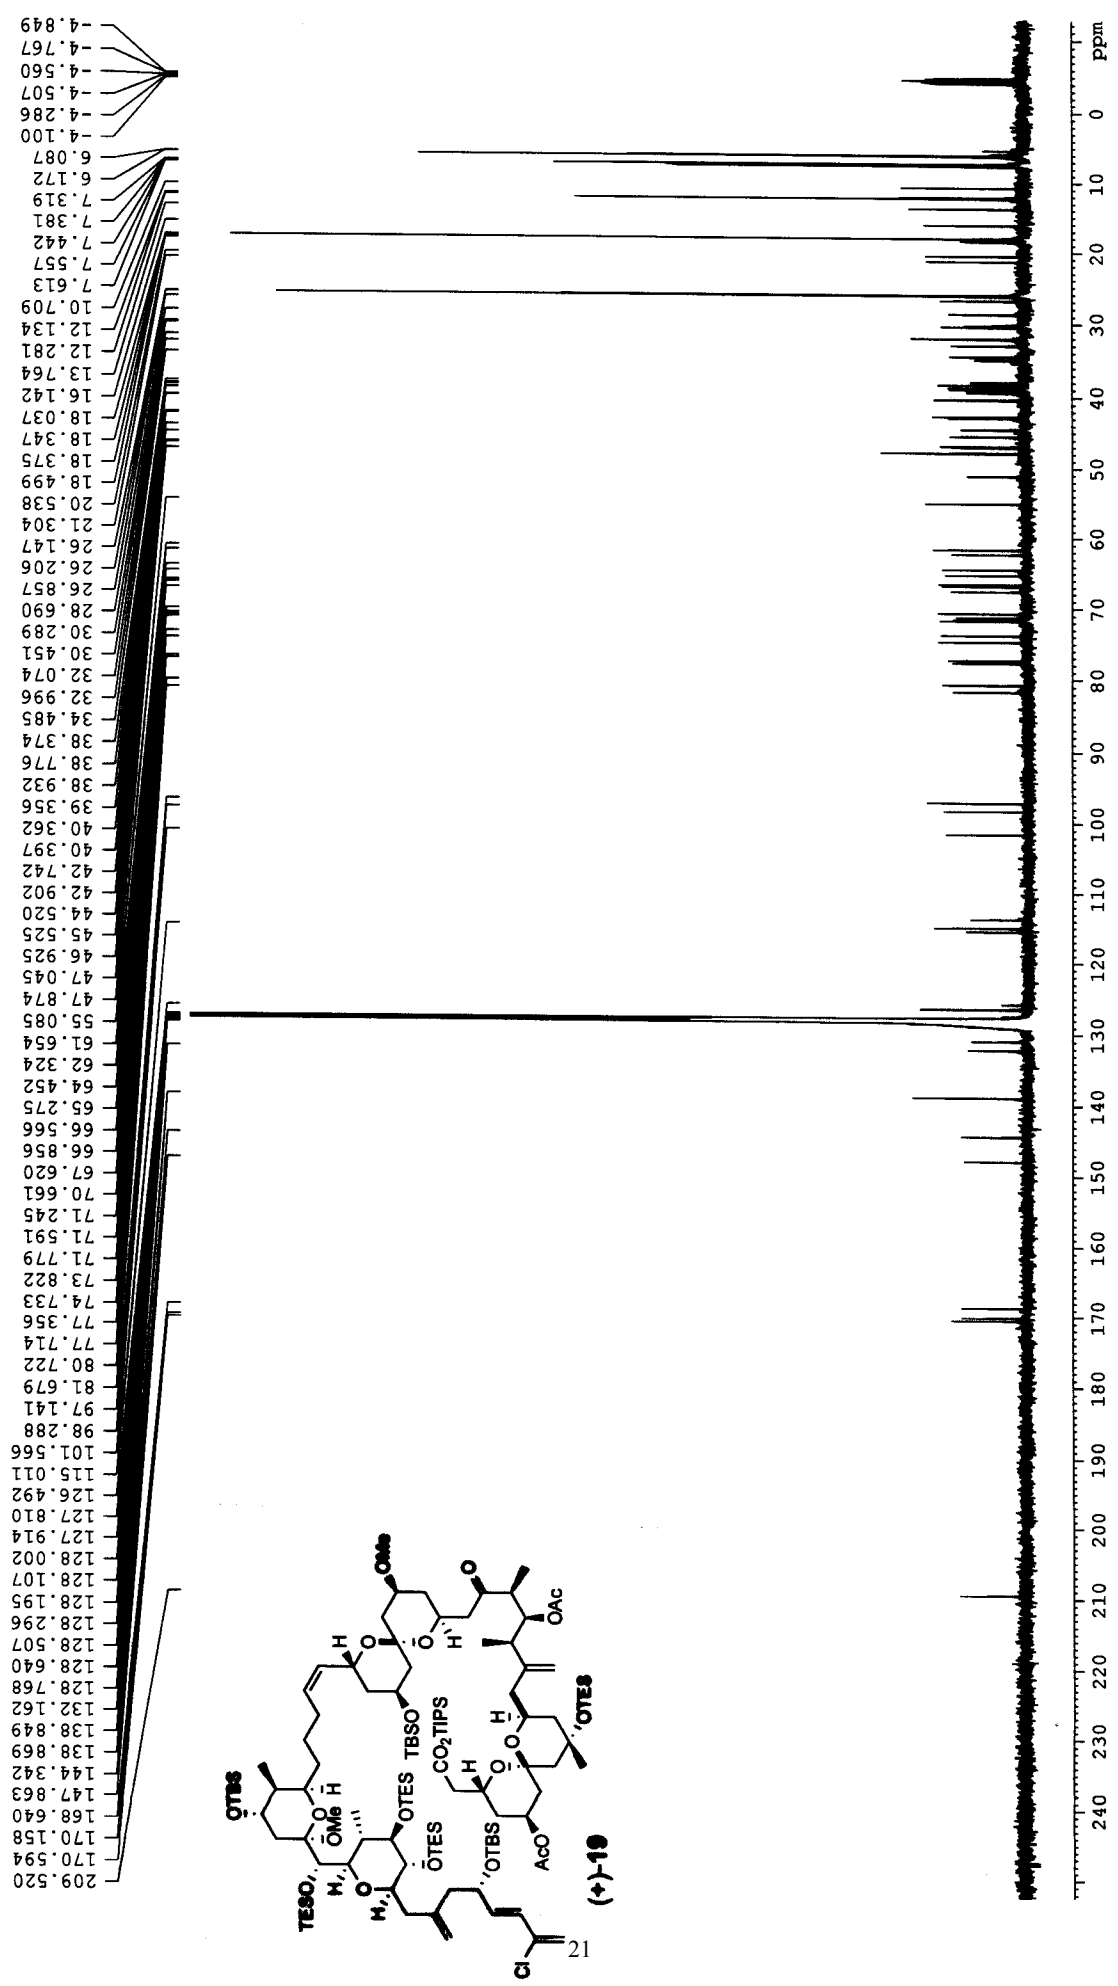

(+)-19

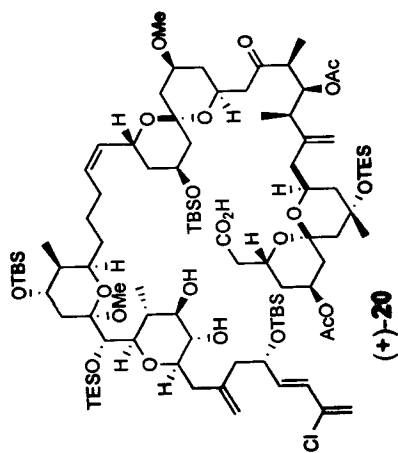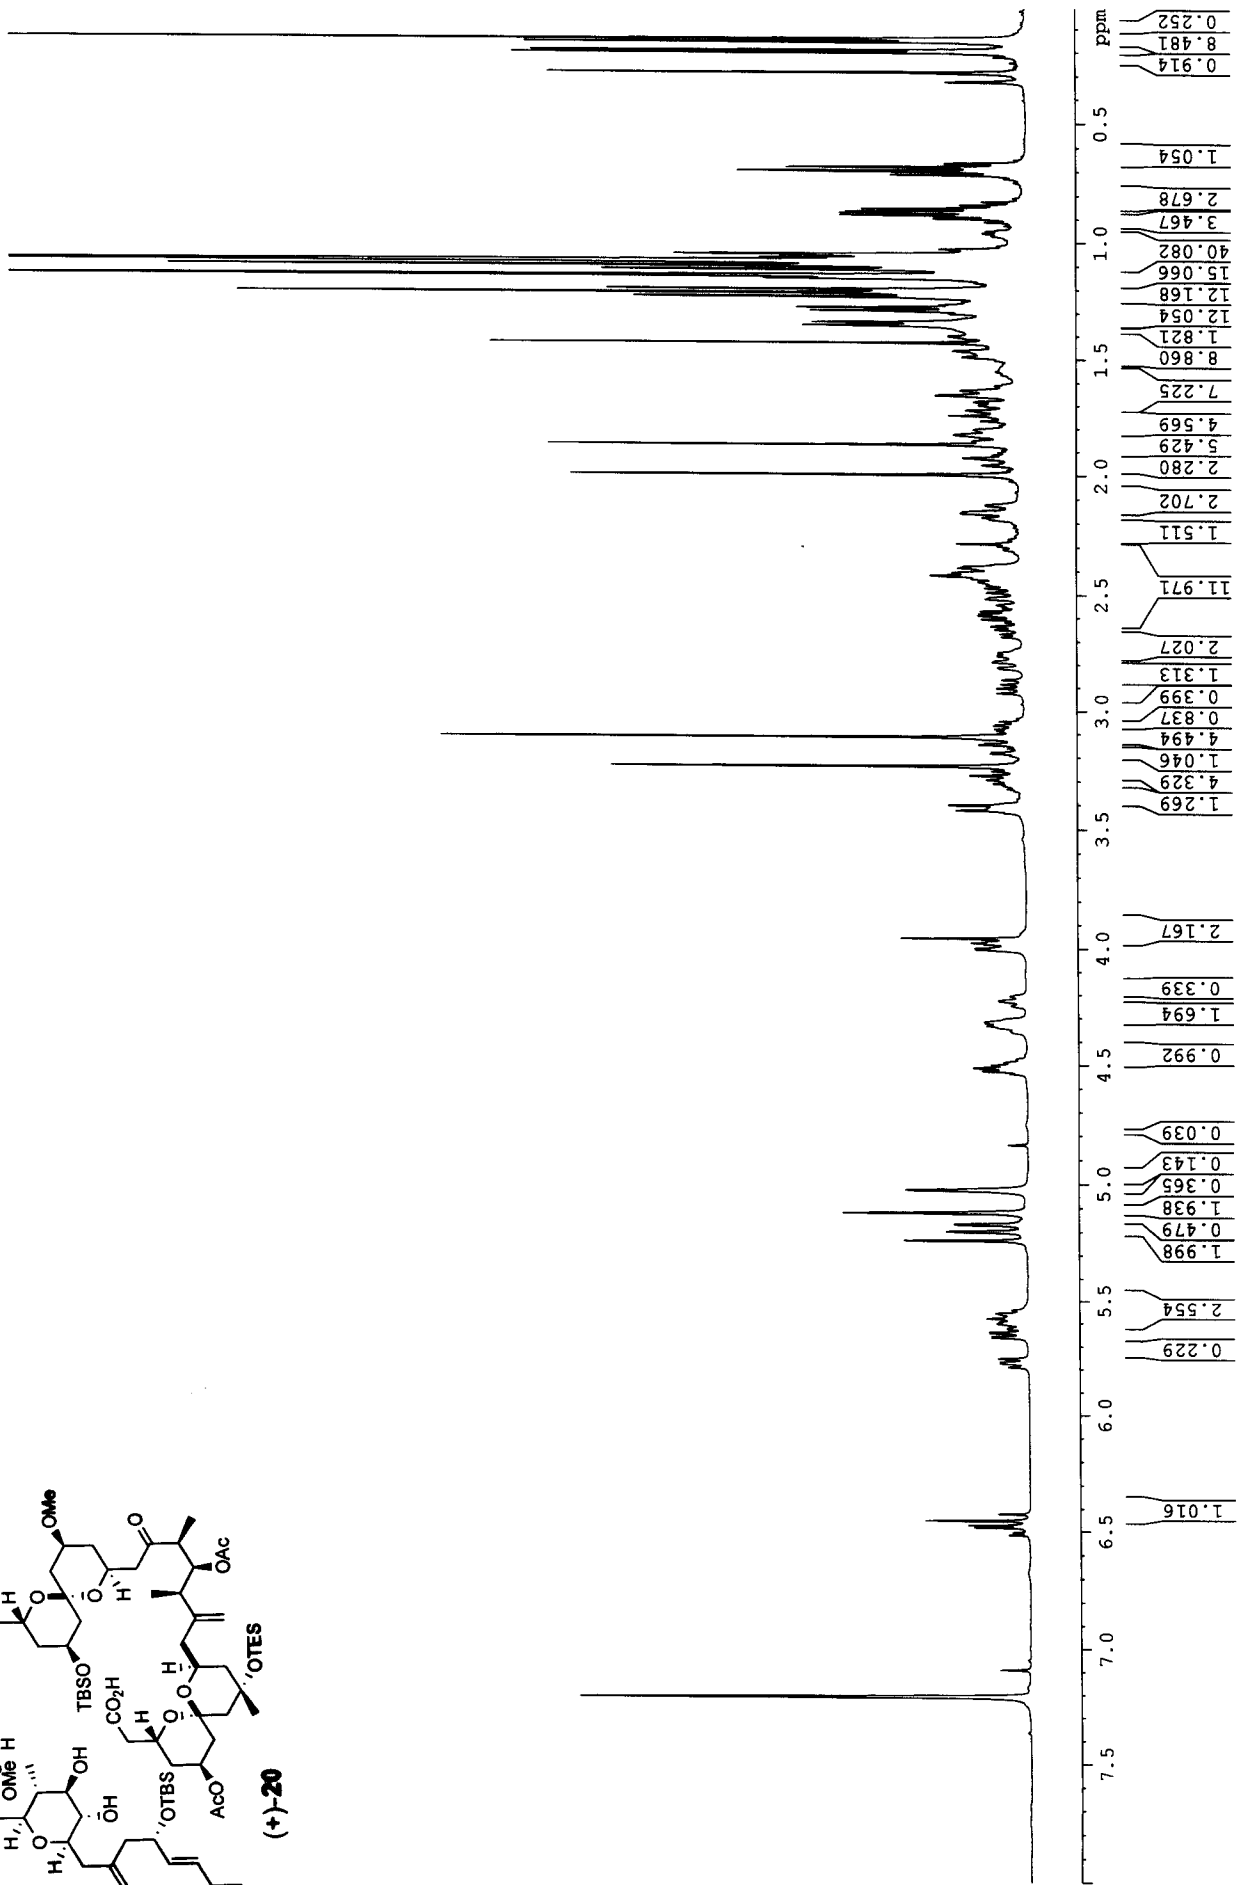

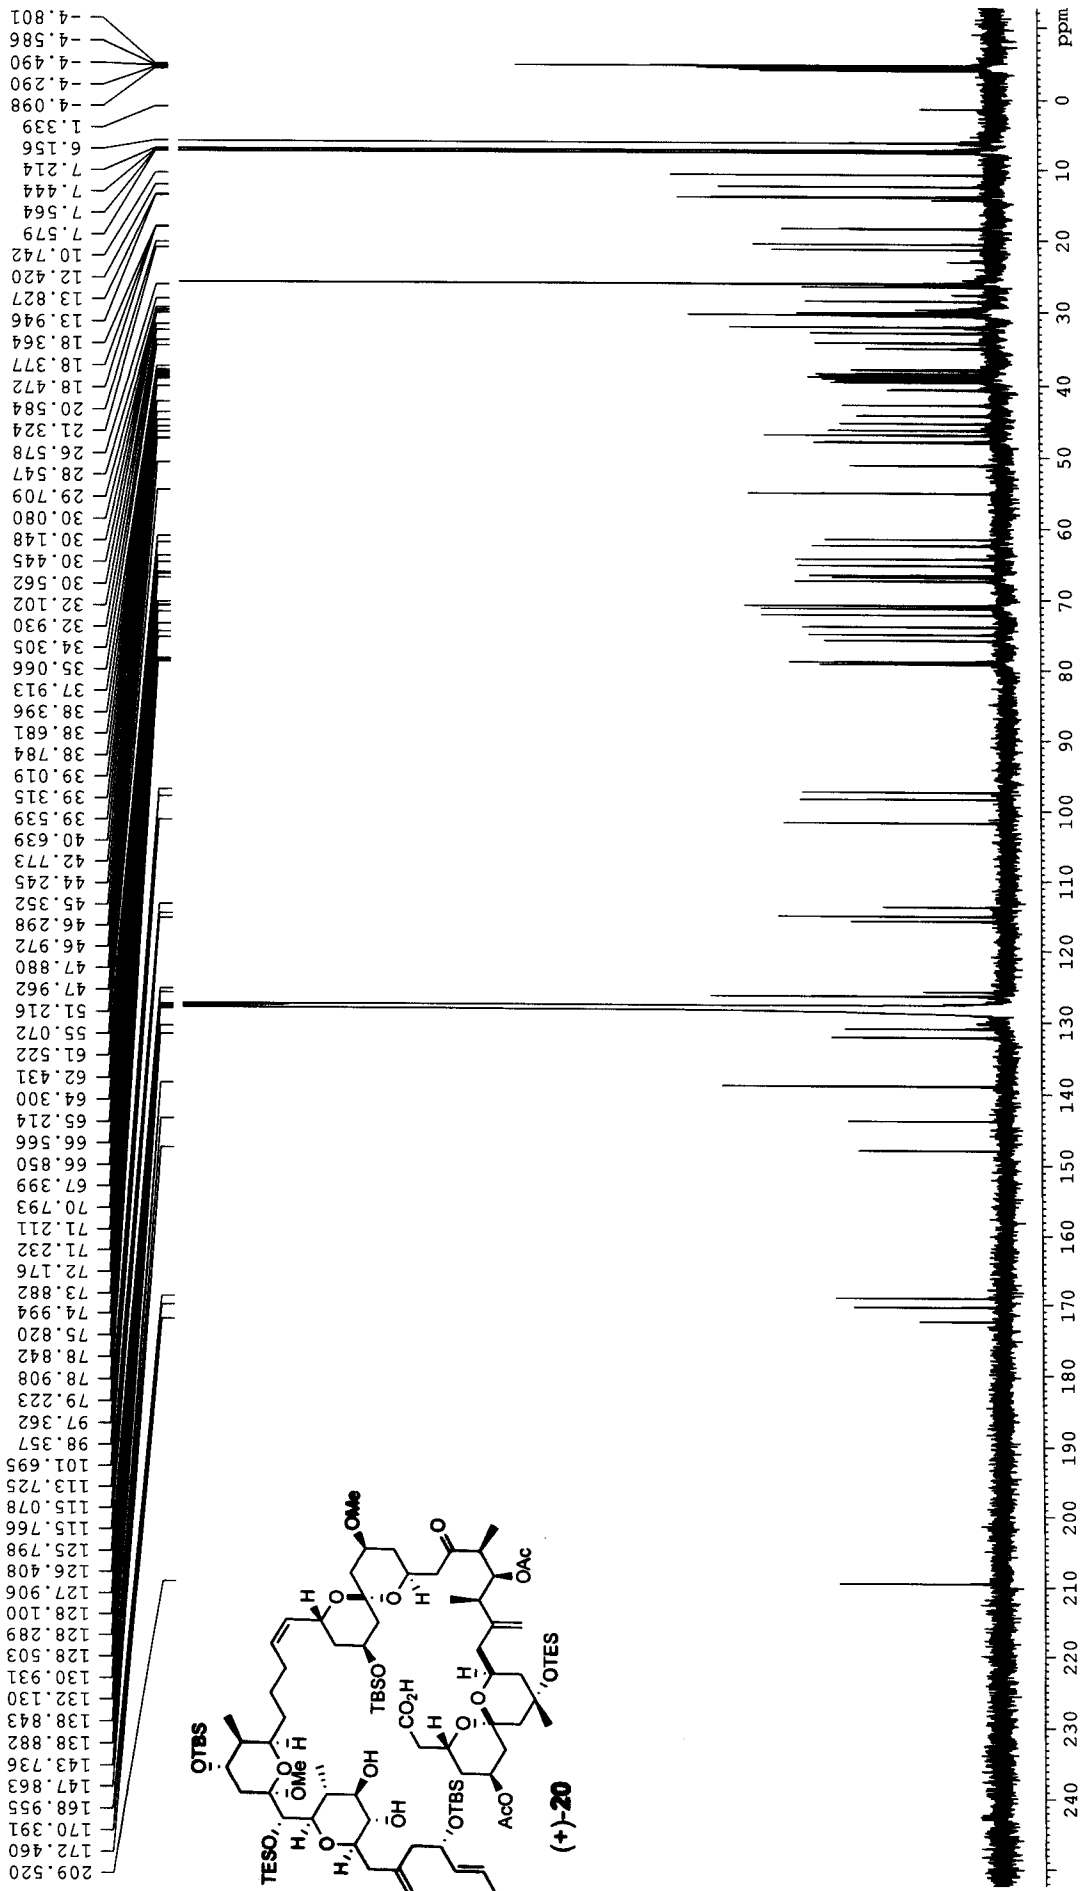

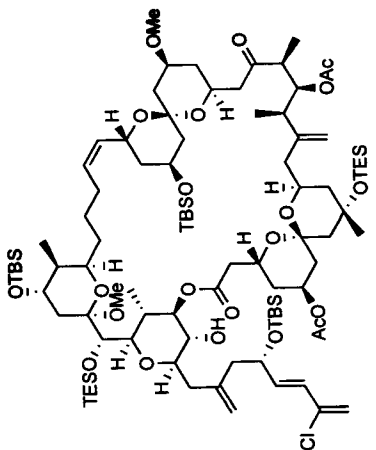

SI-4

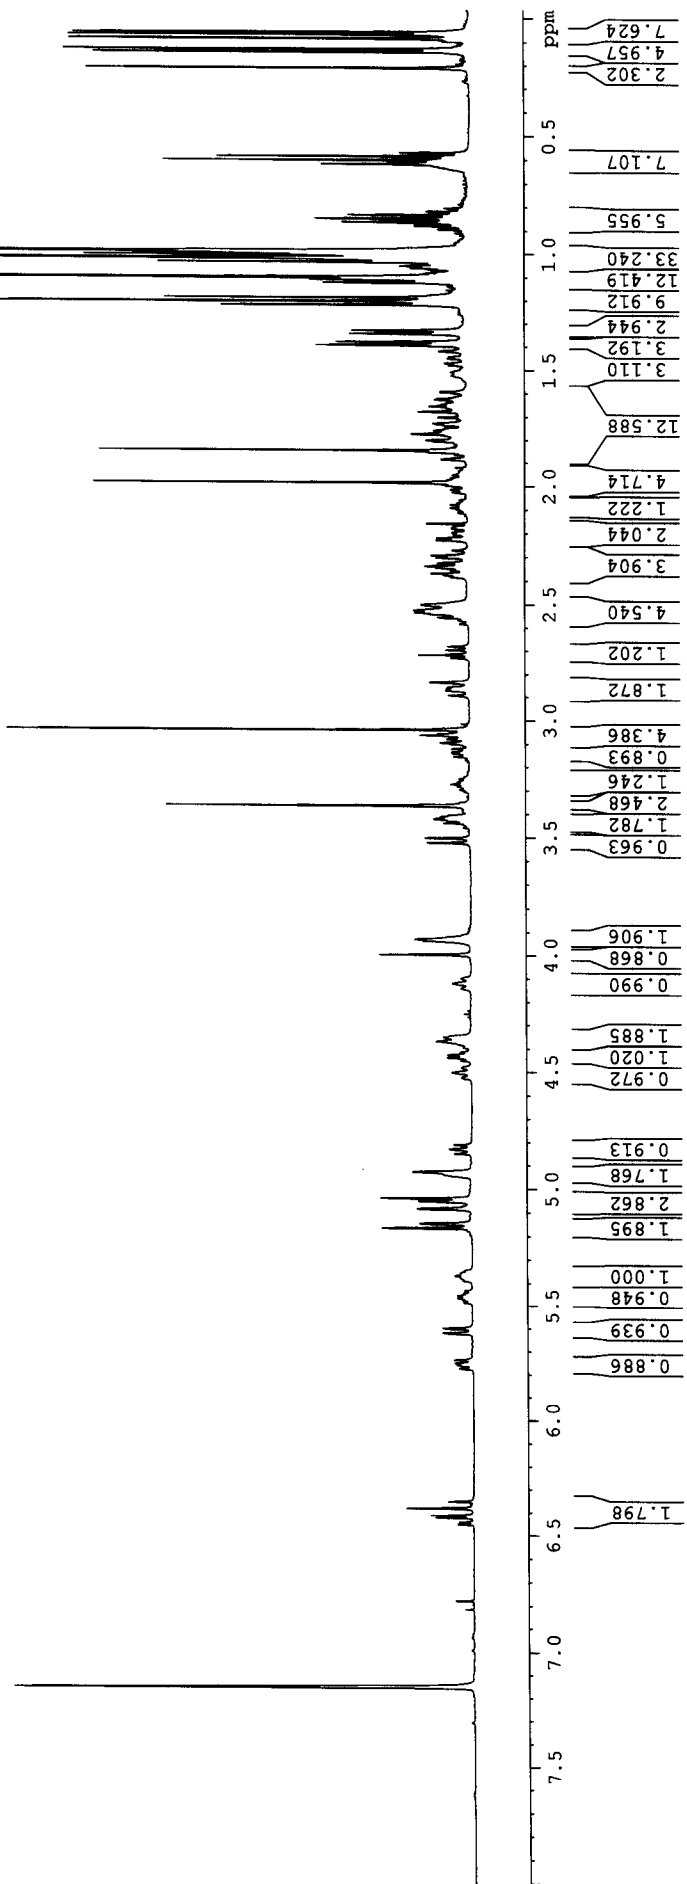



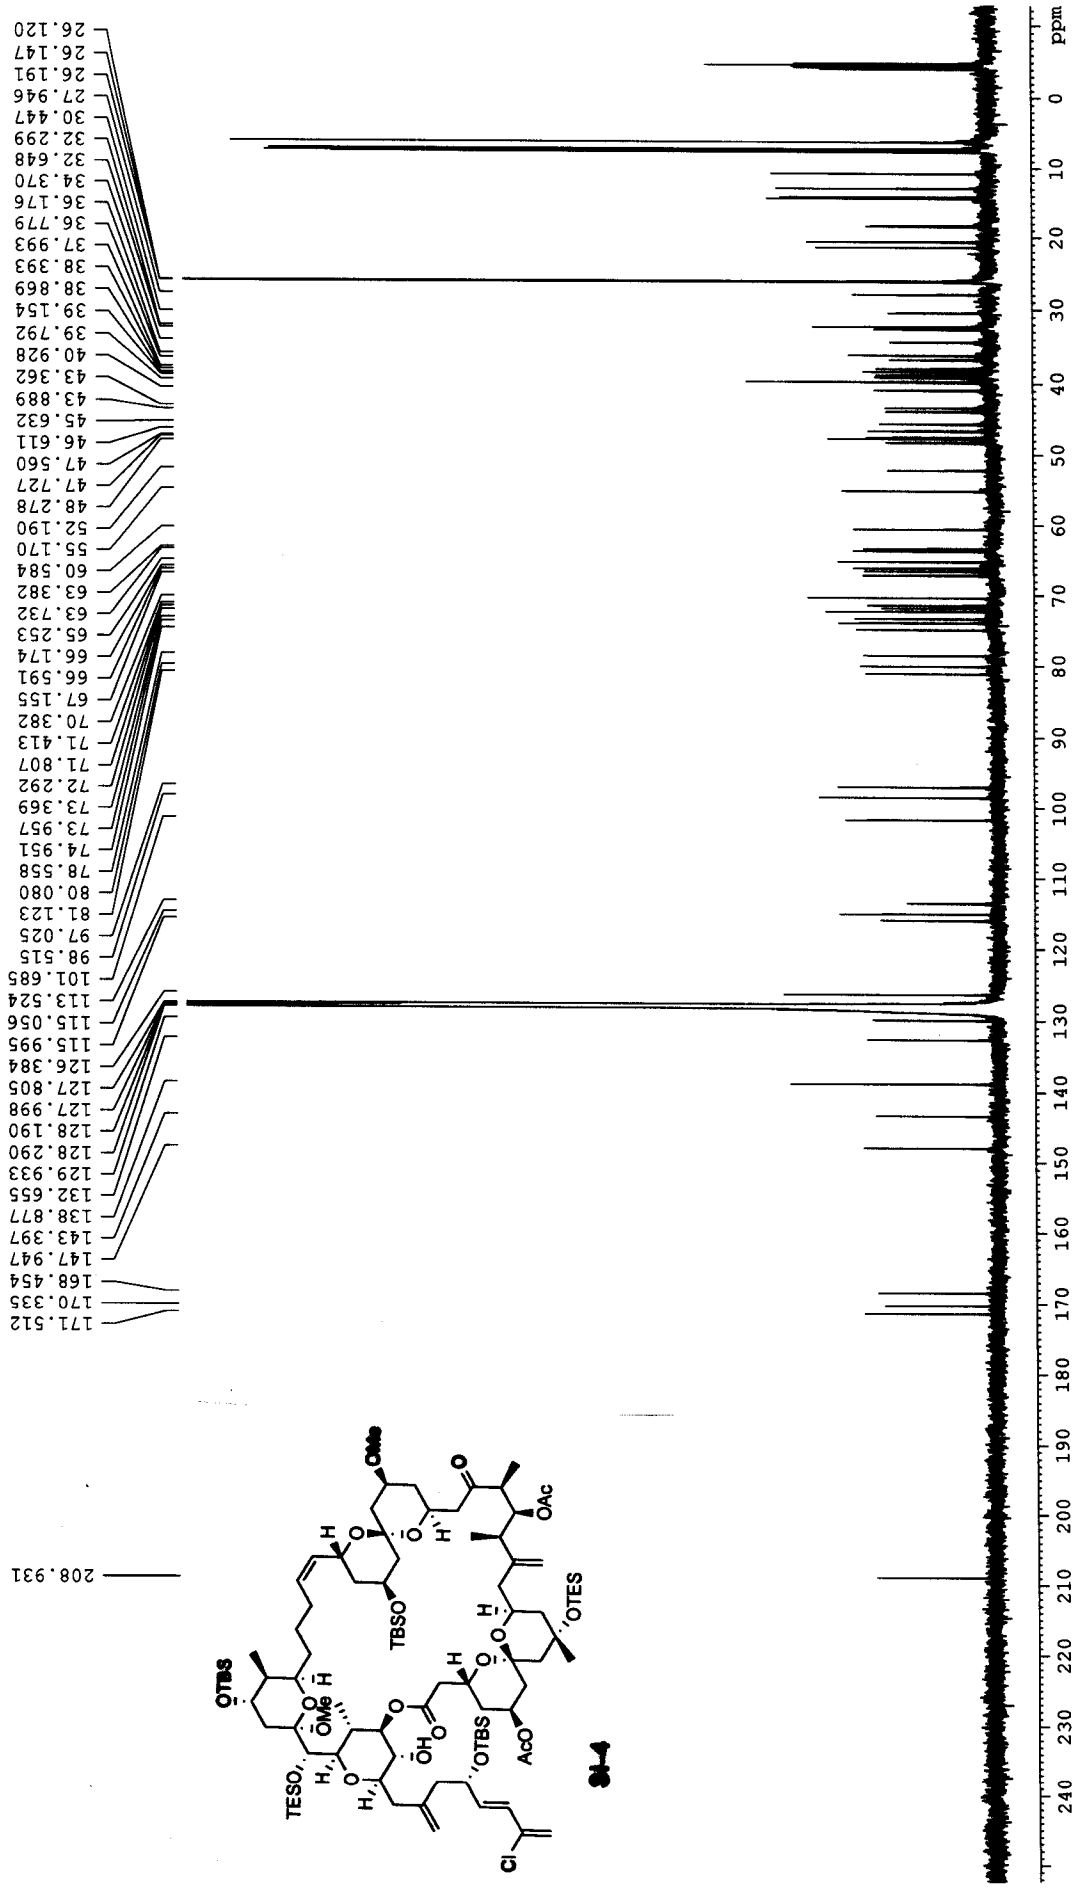

(+)-Spongistatin 1

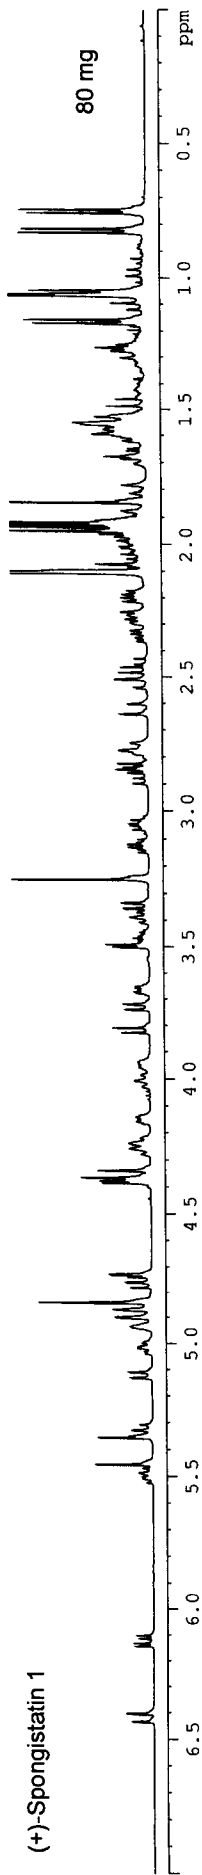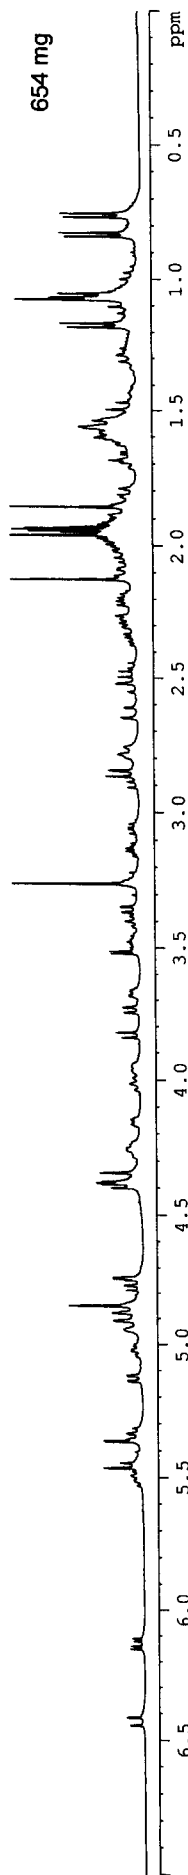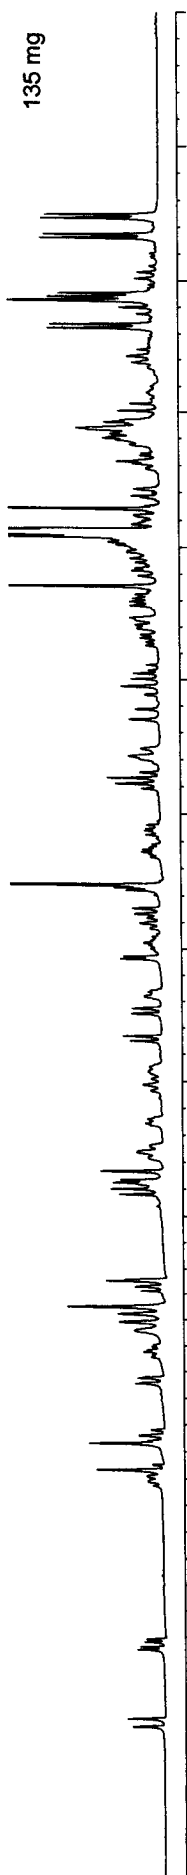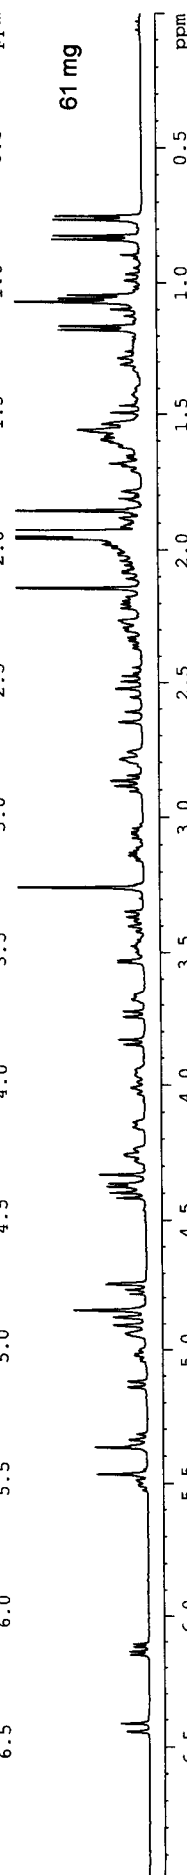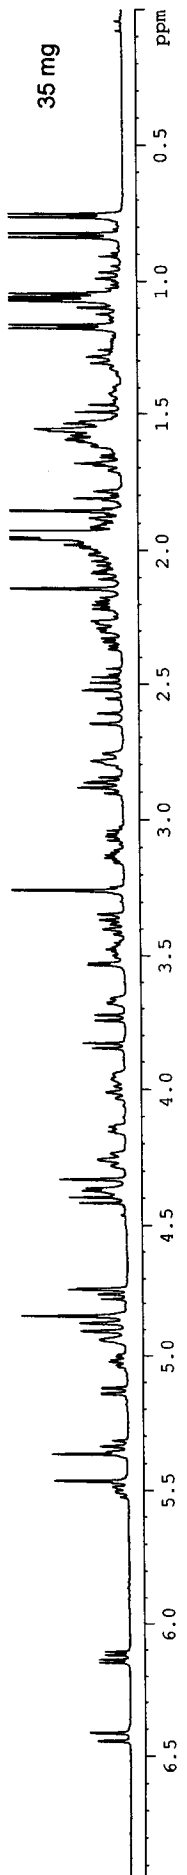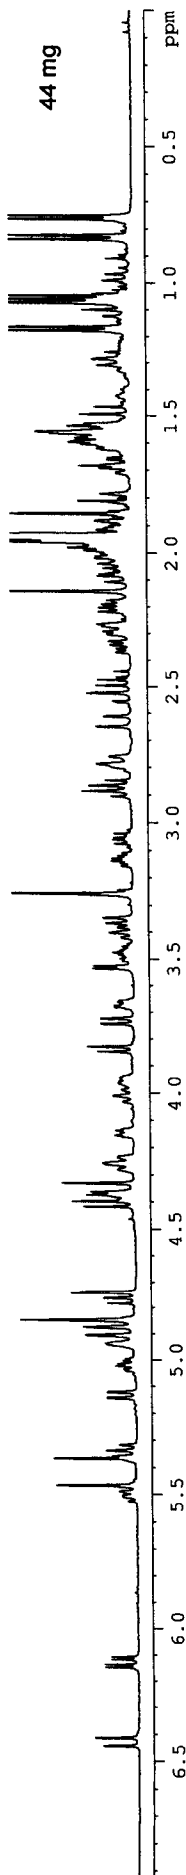

Supplement: NIHMS86308-supplement-1_si_001.pdf [file NIHMS86308-supplement-1_si_001.pdf]
